# Supplementary material for: Identification and Characterization of Bacterial Diterpene Cyclases that Synthesize the Cembrane Skeleton
Source: PubMed Central journal article supplement (PMC3790952; doi:10.1002/cbic.201200651), 2013-02-06
Supplement: cbic0014-0316-sd1.pdf [file cbic0014-0316-sd1.pdf]

**CHEMBIOCHEM**

## Supporting Information

© Copyright Wiley-VCH Verlag GmbH & Co. KGaA, 69451 Weinheim, 2013

### **Identification and Characterization of Bacterial Diterpene Cyclases that Synthesize the Cembrane Skeleton**

Ayuko Meguro, Takeo Tomita, Makoto Nishiyama, and Tomohisa Kuzuyama\*<sup>[a]</sup>

cbic\_201200651\_sm\_miscellaneous\_information.pdf

## Supporting Information

### **<sup>1</sup>H-NMR, <sup>13</sup>C-NMR, and MS spectral data and optical rotations of the diterpene products.**

The isopropylidene isomer of cembrene C (**1**) is a known natural product, but we were unable to directly compare the spectral data of **1** to those of the isopropylidene isomer of cembrene C.<sup>[1]</sup> In contrast, the identity of the diterpene products **2** and **3** generated by the recombinant DtcycA and DtcycB enzymes was established by direct comparison of the <sup>1</sup>H NMR, <sup>13</sup>C NMR and [ $\alpha$ ]<sub>D</sub><sup>20</sup> data with literature data.

**(1E,5E,9E)-1,5,9-Trimethyl-12-(propan-2-ylidene)cyclotetradeca-1,5,9-triene (1)**, the isopropylidene isomer of cembrene C, was generated by the DtcycA-catalyzed reaction using GGDP as the substrate.

The molecular formula of **1** was deduced to be C<sub>20</sub>H<sub>32</sub> using positive high-resolution mass spectrometry (*m/z* 273.2576 [M+H]<sup>+</sup>, calcd. for C<sub>20</sub>H<sub>33</sub>, 273.2582). The <sup>1</sup>H NMR spectrum (Figure S8) of product **1** indicated the presence of three olefinic protons (δ 4.92, 4.99, and 5.02 ppm; each 1H, triplet, *J* = 6.8, 7.6, and 7.6 Hz), and three tertiary olefinic carbon signals (δ 124.1, 124.8, 126.3 ppm) and five quaternary olefinic carbon signals (δ 124.7, 131.2, 133.1, 133.7, and 135.0 ppm) were apparent in the <sup>13</sup>C NMR spectrum (Figure S9), indicating that compound **1** is a monocyclic compound with four double bonds in the ring. All methyl groups exhibited resonances that are typical of allylic methyl groups (<sup>1</sup>H, δ 1.54, 1.57, 1.58, 1.63, and 1.65; each 3H, singlet; <sup>13</sup>C, δ 15.0, 15.3, 15.9, 20.5, and 20.7 ppm, respectively). The 14 remaining protons appeared in the region at δ 1.93 – 2.80 ppm (Table S1). The directly bonded carbon and hydrogen atoms were assigned based on the HSQC spectrum. Using an extensive NMR spectroscopic analysis, including COSY and HMBC experiments, we determined that the structure of **1** is (1E,5E,9E)-1,5,9-trimethyl-12-(propan-2-ylidene)cyclotetradeca-1,5,9-triene. Selected key HMBC and COSY correlations of **1** are shown below.

**Table S1.** <sup>1</sup>H- and <sup>13</sup>C-NMR spectral data for diterpene **1**.

| <b>1</b> |                 |                |                |                  |
|----------|-----------------|----------------|----------------|------------------|
| #        |                 | δ <sub>c</sub> | δ <sub>H</sub> | HMBC             |
| 1        | C=              | 133.7          |                |                  |
| 2        | CH <sub>2</sub> | 39.0           | 2.11 (t, 6.2)  | 1, 3, 4, 14, 15  |
| 3        | CH <sub>2</sub> | 24.9           | 2.16 (m)       | 2, 4             |
| 4        | CH=             | 126.3          | 4.92 (t, 6.8)  | 3, 6, 16         |
| 5        | C=              | 133.1          |                |                  |
| 6        | CH <sub>2</sub> | 40.0           | 2.00 (t, 5.8)  | 4, 5, 7, 8, 16   |
| 7        | CH <sub>2</sub> | 23.8           | 2.05 (m)       | 6, 8             |
| 8        | CH=             | 124.1          | 4.99 (t, 7.6)  | 6, 7, 10, 17     |
| 9        | C=              | 135.0          |                |                  |
| 10       | CH <sub>2</sub> | 37.4           | 1.93 (t, 7.6)  | 8, 9, 11, 12, 17 |
| 11       | CH <sub>2</sub> | 31.4           | 2.16 (t, 7.6)  | 9, 10, 12        |
| 12       | C=              | 131.2          |                |                  |
| 13       | CH <sub>2</sub> | 30.5           | 2.80 (d, 7.6)  | 1, 11, 12        |
| 14       | CH=             | 124.8          | 5.02 (t, 7.6)  | 2, 13            |
| 15       | CH <sub>3</sub> | 15.9           | 1.58 (s)       | 1, 2, 14         |
| 16       | CH <sub>3</sub> | 15.0           | 1.54 (s)       | 4, 5, 6          |
| 17       | CH <sub>3</sub> | 15.3           | 1.57 (s)       | 8, 9, 10         |
| 18       | C=              | 124.7          |                |                  |
| 19       | CH <sub>3</sub> | 20.5           | 1.63 (s)       | 12, 18, 20       |
| 20       | CH <sub>3</sub> | 20.7           | 1.65 (s)       | 12, 18           |

The data were recorded using CDCl<sub>3</sub>.

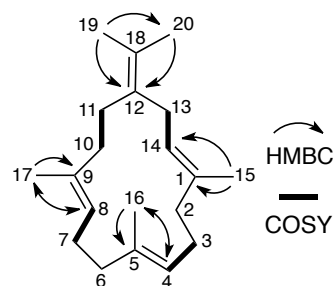

**2-((S,3E,7E,11E)-4,8,12-Trimethylcyclotetradeca-3,7,11-trien-1-yl)propan-2-ol** (**2**)  
 ((*R*)-nephthenol) was generated by the DtcycA- and DtcycB-catalyzed reactions using GGDP as the substrate.

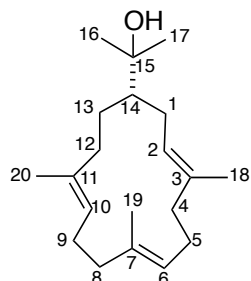

**Table S2.** <sup>1</sup>H- and <sup>13</sup>C-NMR spectral data for diterpene **2** and (*R*)-nephthenol.

| #  | <b>2</b> <sup>[a]</sup> |                    | <i>(R)</i> -nephthenol <sup>[b]</sup> |
|----|-------------------------|--------------------|---------------------------------------|
|    | $\delta_C$              | $\delta_H$         | $\delta_C$                            |
| 1  | 28.5                    | 2.1 (m), 1.88 (m)  | 28.42                                 |
| 2  | 126.0                   | 5.09 (t, 7.2)      | 125.93                                |
| 3  | 133.4                   |                    | 133.33                                |
| 4  | 38.9                    | 2.09 (m)           | 38.81                                 |
| 5  | 24.7                    | 2.18 (m), 2.13 (m) | 24.64                                 |
| 6  | 125.8                   | 4.93 (t, 6.4)      | 125.74                                |
| 7  | 133.1                   |                    | 133.02                                |
| 8  | 39.5                    | 2.00 (m, 6.2)      | 39.39                                 |
| 9  | 24.0                    | 2.09 (m)           | 23.99                                 |
| 10 | 125.0                   | 4.99 (t, 6.0)      | 124.96                                |
| 11 | 134.1                   |                    | 134.02                                |
| 12 | 37.7                    | 2.06 (m), 2.01 (m) | 37.69                                 |
| 13 | 28.3                    | 1.63 (m), 1.25 (m) | 28.26                                 |
| 14 | 48.5                    | 1.31 (m)           | 48.44                                 |
| 15 | 74.1                    |                    | 73.93                                 |
| 16 | 27.7                    | 1.19 (s)           | 27.64                                 |
| 17 | 27.5                    | 1.19 (s)           | 27.48                                 |
| 18 | 15.6                    | 1.54 (s)           | 15.54                                 |
| 19 | 15.3                    | 1.56 (s)           | 15.28                                 |
| 20 | 15.6                    | 1.54 (s)           | 15.53                                 |

<sup>[a]</sup>The data were recorded using CDCl<sub>3</sub>. <sup>[b]</sup>The data were recorded using CDCl<sub>3</sub>.<sup>[2]</sup>

Specific optical rotation of **2**,  $[\alpha]_D^{20} = -31^\circ$  ( $c = 0.61$ , CHCl<sub>3</sub>).

Specific optical rotation of (*R*)-nephthenol,  $[\alpha]_D^{20} = -39.6^\circ$  ( $c = 1.11$ , CHCl<sub>3</sub>).<sup>[2]</sup>

**(S,1E,5E,9E)-1,5,9-Trimethyl-12-(prop-1-en-2-yl)cyclotetradeca-1,5,9-triene (3)** ((*R*)-cembrene A) was generated by the DtcycB-catalyzed reaction using GGDP as the substrate.

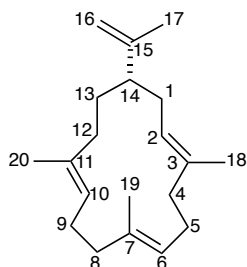

**Table S3.**  $^1\text{H}$ - and  $^{13}\text{C}$ -NMR spectral data for diterpene **3** and (*R*)-cembrene A.

| #  | <b>3</b> <sup>[a]</sup> |                     | ( <i>R</i> )-cembrene A <sup>[b]</sup> |
|----|-------------------------|---------------------|----------------------------------------|
|    | $\delta_{\text{C}}$     | $\delta_{\text{H}}$ | $\delta_{\text{C}}$                    |
| 1  | 32.5                    | 1.98 (m)            | 32.43                                  |
| 2  | 121.9                   | 5.05 (t, 6.1)       | 121.87                                 |
| 3  | 134.0                   |                     | 133.91                                 |
| 4  | 39.0                    | 2.02 (m)            | 38.94                                  |
| 5  | 24.9                    | 2.15 (m)            | 24.89                                  |
| 6  | 124.1                   | 5.18 (t, 7.2)       | 124.07                                 |
| 7  | 134.9                   |                     | 134.79                                 |
| 8  | 39.5                    | 2.06 (m)            | 39.41                                  |
| 9  | 23.8                    | 2.12 (m)            | 23.76                                  |
| 10 | 126.0                   | 4.97 (t, 6.6)       | 125.90                                 |
| 11 | 133.5                   |                     | 133.43                                 |
| 12 | 34.0                    | 2.12 (m)            | 33.99                                  |
| 13 | 28.2                    | 1.94 (m)            | 28.22                                  |
| 14 | 46.1                    | 2.02 (m)            | 45.98                                  |
| 15 | 149.4                   |                     | 149.29                                 |
| 16 | 110.2                   | 4.70 (s), 4.63 (s)  | 110.10                                 |
| 17 | 19.4                    | 1.65 (s)            | 19.31                                  |
| 18 | 18.1                    | 1.55 (s)            | 17.99                                  |
| 19 | 15.4                    | 1.58 (s)            | 15.25                                  |
| 20 | 15.6                    | 1.56 (s)            | 15.48                                  |

<sup>[a]</sup>The data were recorded using  $\text{CDCl}_3$ . <sup>[b]</sup>The data were recorded using  $\text{CDCl}_3$ .<sup>[2]</sup>

Specific optical rotation of **3**,  $[\alpha]_{\text{D}}^{20} = -2.8^\circ$  ( $c = 0.58$ ,  $\text{CHCl}_3$ ).

Specific optical rotation of (*R*)-cembrene A,  $[\alpha]_{\text{D}}^{20} = -12^\circ$  ( $c = 0.85$ ,  $\text{CHCl}_3$ ).<sup>[2]</sup>

## LEGENDS FOR SUPPLEMENTARY FIGURES

**Figure S1.** Biosynthesis of the diterpenes isolated from actinomycetes. GGDP synthase catalyzes the condensation of one molecule of DMAPP and three molecules of IPP to yield GGDP. Diterpene cyclases catalyze the cyclization of GGDP to produce various diterpenes. Cyclooctat-9-en-7-ol synthase (CotB2) is a class I terpene synthase.<sup>[3]</sup> Terpentadienyl diphosphate synthase (Cyc1),<sup>[4]</sup> <sup>[5]</sup> *ent*-copalyl diphosphate synthase (SsCPS),<sup>[6]</sup> <sup>[7]</sup> and halimadienyl diphosphate synthase (Rv3377c)<sup>[8]</sup> are class II terpene cyclases. Terpentadienyl diphosphate is converted into terpentetriene by a class I terpene synthase Cyc2,<sup>[4]</sup> <sup>[5]</sup> *ent*-copalyl diphosphate is converted into (-)-pimara-9(11),15-diene by a class I terpene synthase ORF3,<sup>[6]</sup> <sup>[7]</sup> and halimadienyl diphosphate is converted into tuberculosinol and isotuberculosinol by a class I terpene synthase Rv3378c.<sup>[9]</sup> A pyrophosphate group remains in each reaction product formed by the class II enzymes, whereas a pyrophosphate group is missing in the reaction product formed by the class I enzyme. IPP, isopentenyl diphosphate; DMAPP, dimethylallyl diphosphate; GGDP, geranylgeranyl diphosphate.

**Figure S2.** Biosynthetic gene clusters involved in the production of diterpenes by *Streptomyces* strains. In each gene cluster, the terpene cyclase gene is located in a region flanking a GGDP synthase gene. *A*, terpentecin-producing *Kitasatospora griseola*<sup>[4]</sup> <sup>[5]</sup>; *B*, viguiepinol-producing *Streptomyces* sp. KO-3988<sup>[6]</sup> <sup>[7]</sup>; *C*, cyclooctatin-producing *Streptomyces melanosporofaciens* MI614-43F2.<sup>[3]</sup>

**Figure S3.** Gene clusters containing the diterpene cyclases DtcycA and DtcycB. Only genes with the same direction as those of the diterpene cyclases are shown. Each GGDP synthase is located immediately upstream of each diterpene cyclase. The sequences of both GGDP synthase as partial sequences. Hypothetical proteins, which may be involved in modification of the diterpene products, are located downstream of each diterpene cyclase.

**Figure S4.** Alignment of two novel diterpene cyclases DtcycA and DtcycB with CotB2, Cyc2, and ORF3. The NSE/DTE motif that is conserved among the five sequences is underlined. Accession numbers: DtcycA, AB738084; DtcycB, AB738085; CotB2, AB448947; Cyc2, AB048795; ORF3, AB183750.

**Figure S5.** Characterization of the DtcycA enzyme. *A*, SDS-PAGE analysis of the recombinant DtcycA protein. *B*, Molecular weight determined by gel filtration (*left*) and calculation (*right*). *C*, Michaelis-Menten plot of the DtcycA-catalyzed reaction using various concentrations of GGDP (0.01–0.2 mM). The  $K_m$  and  $k_{cat}$  values were determined using a hypobolic fit of the data with SigmaPlot.

**Figure S6.** Characterization of the DtcycB enzyme. *A*, SDS-PAGE analysis of the recombinant DtcycB protein. *B*, Molecular weight determined by gel filtration (*left*) and calculation (*right*). *C*, Michaelis-Menten plot of the DtcycB-catalyzed reaction using various concentrations of GGDP (0.01–0.2 mM). The  $K_m$  and  $k_{cat}$  values were determined using a hypobolic fit of the data with SigmaPlot.

**Figure S7.** MS spectra of the diterpene products **1**, **2**, **3**, and **4**.

**Figure S8.** <sup>1</sup>H NMR (CDCl<sub>3</sub>) spectrum for **1**.

**Figure S9.** <sup>13</sup>C NMR (CDCl<sub>3</sub>) spectrum for **1**.

**Figure S10.** COSY spectrum for **1**.

**Figure S11.** HSQC spectrum for **1**.

**Figure S12.** HMBC spectrum for **1**.

**Figure S13.**  $^1\text{H}$  NMR ( $\text{CDCl}_3$ ) spectrum for **4**.

**Figure S14.**  $^{13}\text{C}$  NMR ( $\text{CDCl}_3$ ) spectrum for **4**.

**Figure S15.** HSQC spectrum for **4**.

**Figure S16.** COSY spectrum for **4**.

**Figure S17.** HMBC spectrum for **4**.

**Figure S18.**  $^1\text{H}$  NMR spectral data of the (*R,S*)-MTPA esters of **4**. The values of both  $\delta(R)$  and  $\delta(S)$  for the (*R,S*)-MTPA derivatives of **4** are presented in ppm in each structure.

## REFERENCES.

- [1] M. Kobayashi, K. Osabe, *Chem. Pharm. Bull.* **1989**, *37*, 631-636.
- [2] R. Schwabe, I. Farkas, H. Pfander, *Helv. Chim. Acta* **1988**, *71*, 292-297.
- [3] S.-Y. Kim, P. Zhao, M. Igarashi, R. Sawa, T. Tomita, M. Nishiyama, T. Kuzuyama, *Chem. Biol.* **2009**, *16*, 736-743.
- [4] T. Dairi, Y. Hamano, T. Kuzuyama, N. Itoh, K. Furihata, H. Seto, *J. Bacteriol.* **2001**, *183*, 6085-6094.
- [5] Y. Hamano, T. Kuzuyama, N. Itoh, K. Furihata, H. Seto, T. Dairi, *J. Biol. Chem.* **2002**, *277*, 37098-37104.
- [6] T. Kawasaki, T. Kuzuyama, Y. Kuwamori, N. Matsuura, N. Itoh, K. Furihata, H. Seto, T. Dairi, *J. Antibiot.* **2004**, *57*, 739-747.
- [7] T. Kawasaki, Y. Hayashi, T. Kuzuyama, K. Furihata, N. Itoh, H. Seto, T. Dairi, *J. Bacteriol.* **2006**, *188*, 1236-1244.
- [8] C. Nakano, T. Okamura, T. Sato, T. Dairi, T. Hoshino, *Chem. Comm.* **2005**, 1016-1018.
- [9] C. Nakano, T. Ootsuka, K. Takayama, T. Mitsui, T. Sato, T. Hoshino, *Biosci. Biotechnol. Biochem.* **2011**, *75*, 75-81.



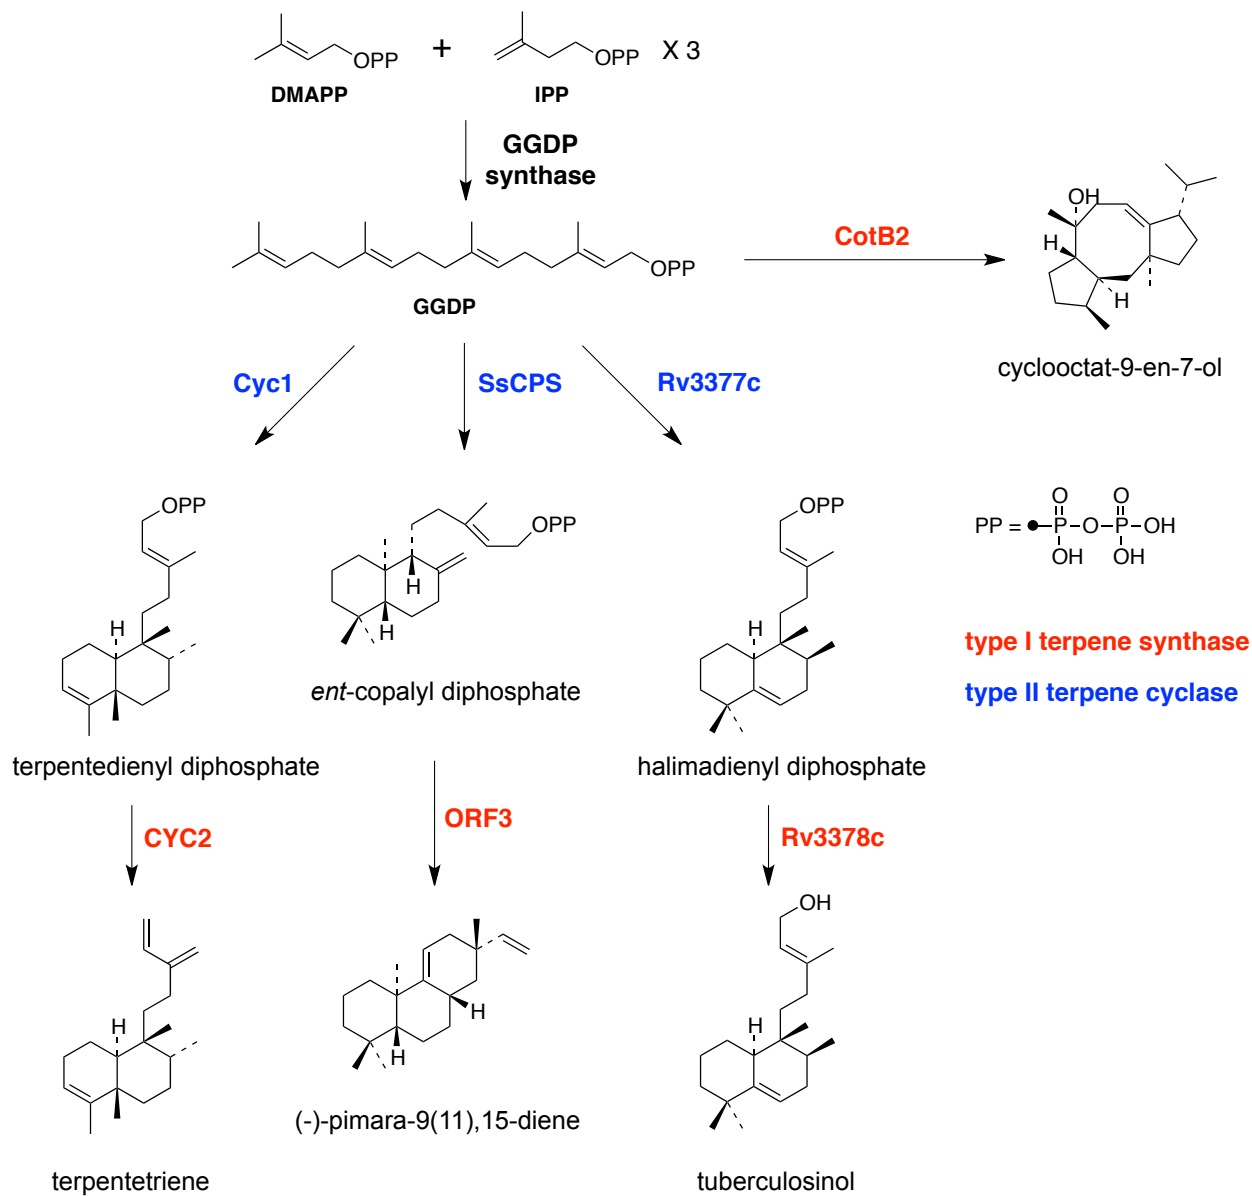

Figure S1

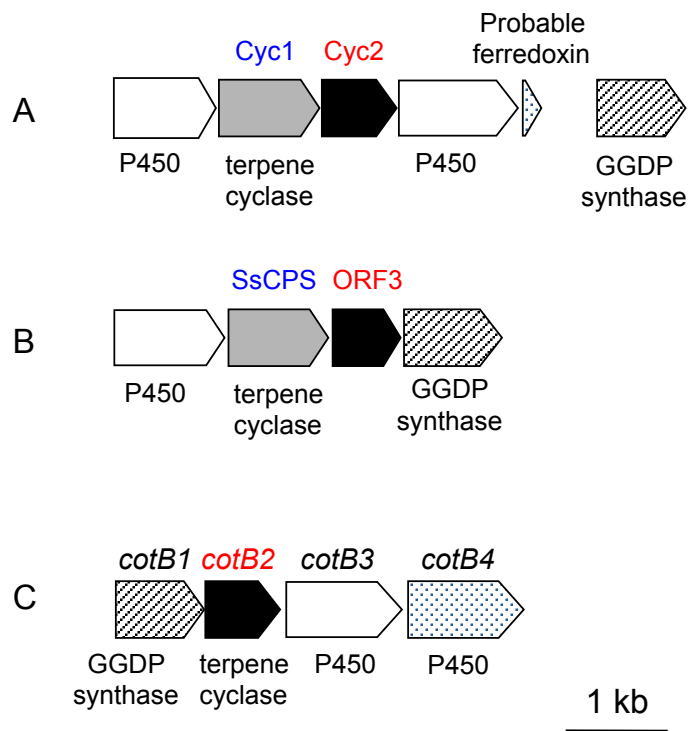

type I terpene synthase

type II terpene cyclase

Figure S2

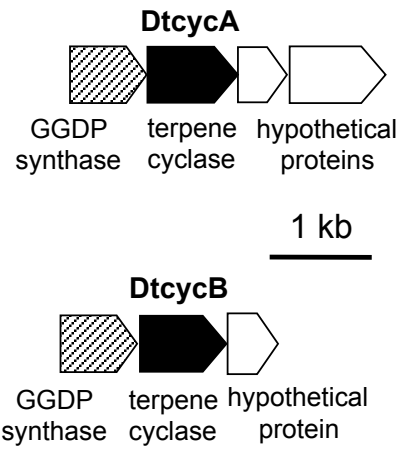

Figure S3



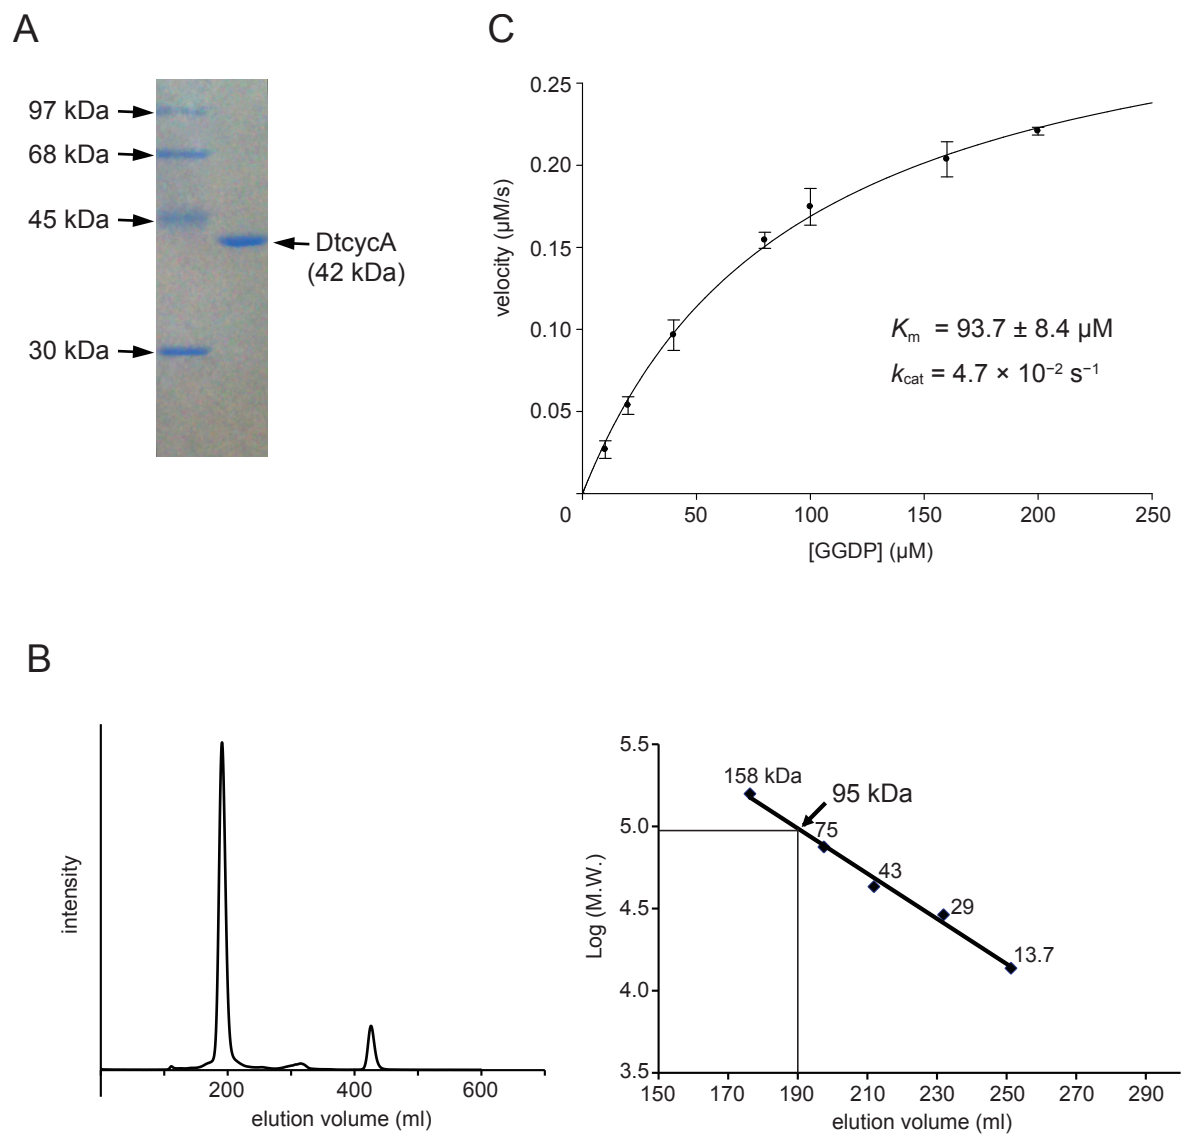

Figure S5

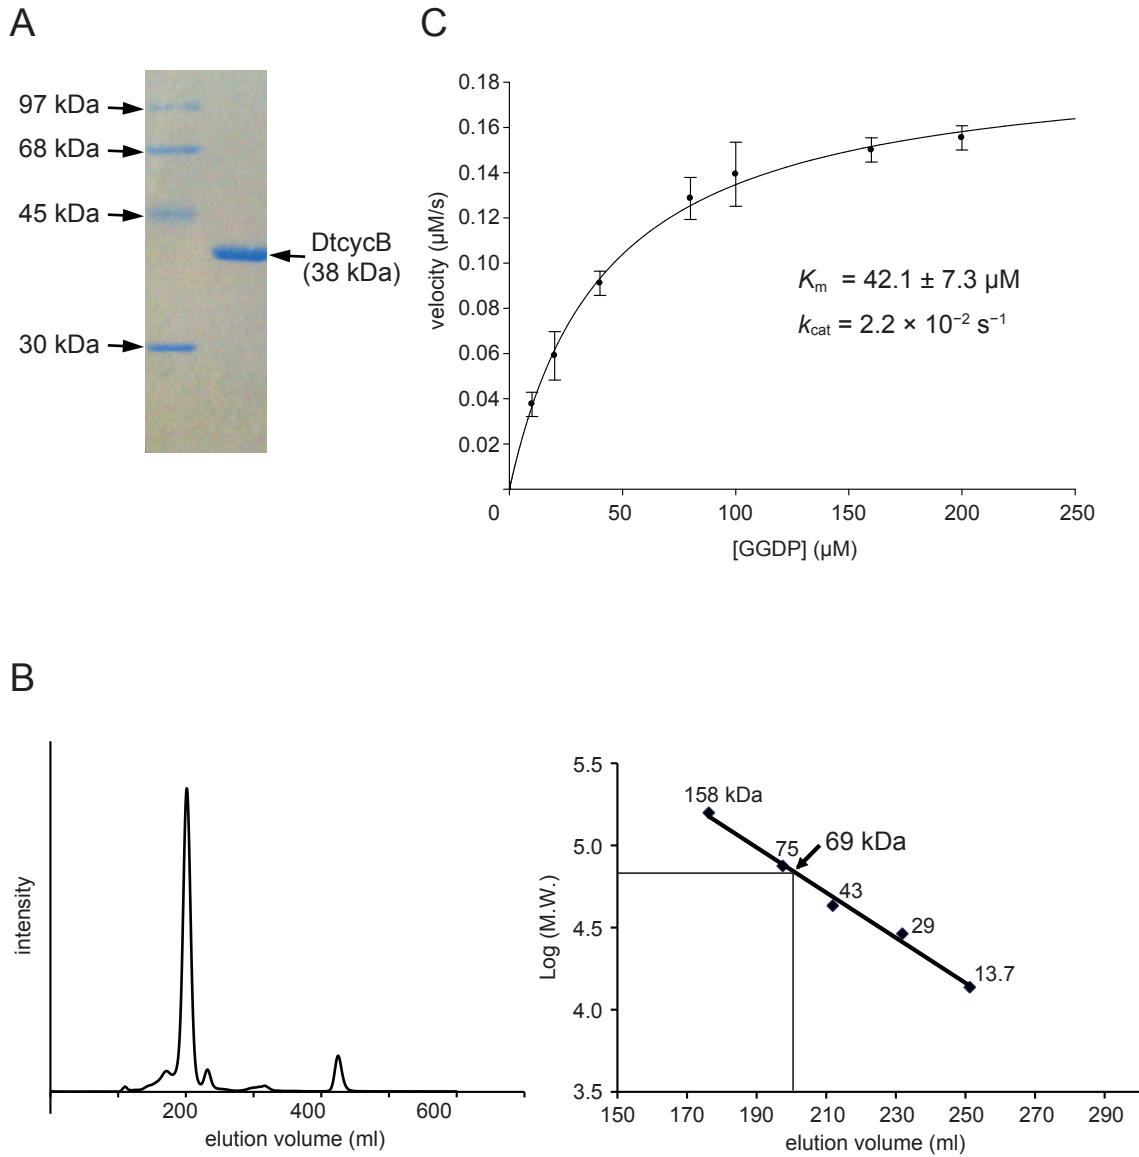

Figure S6

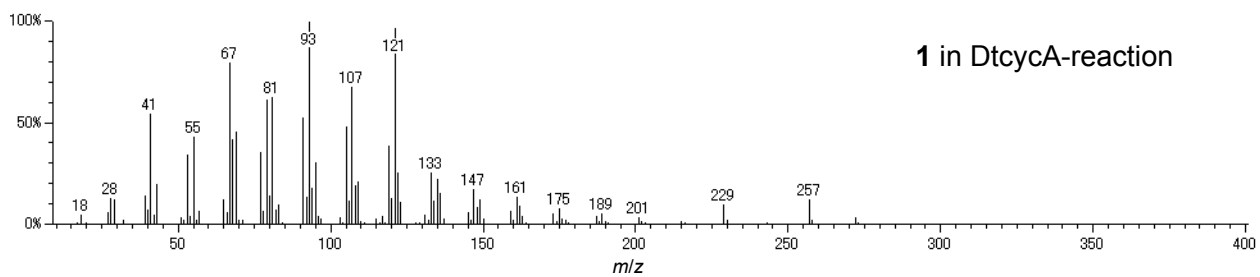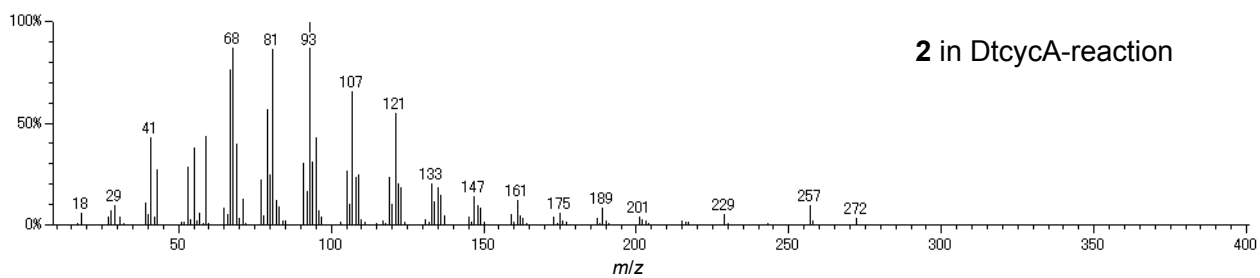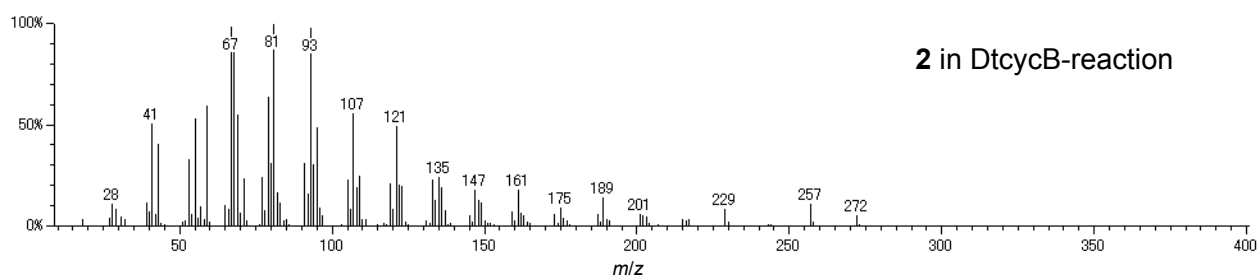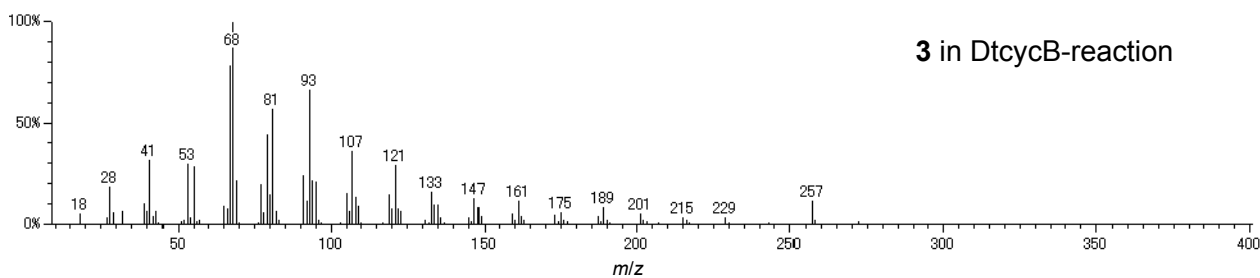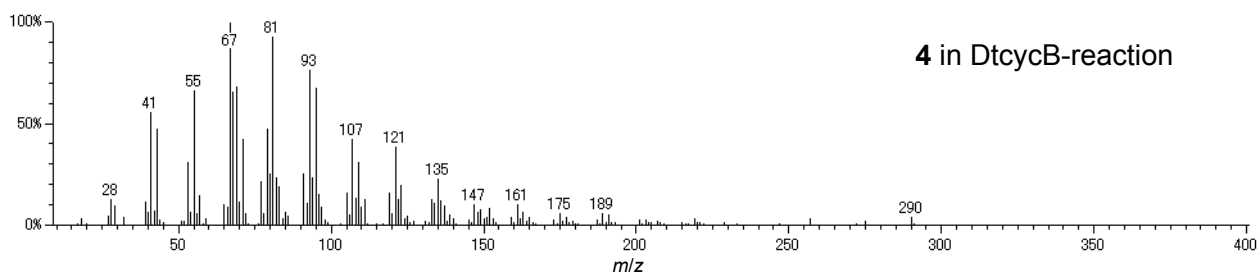

Figure S7

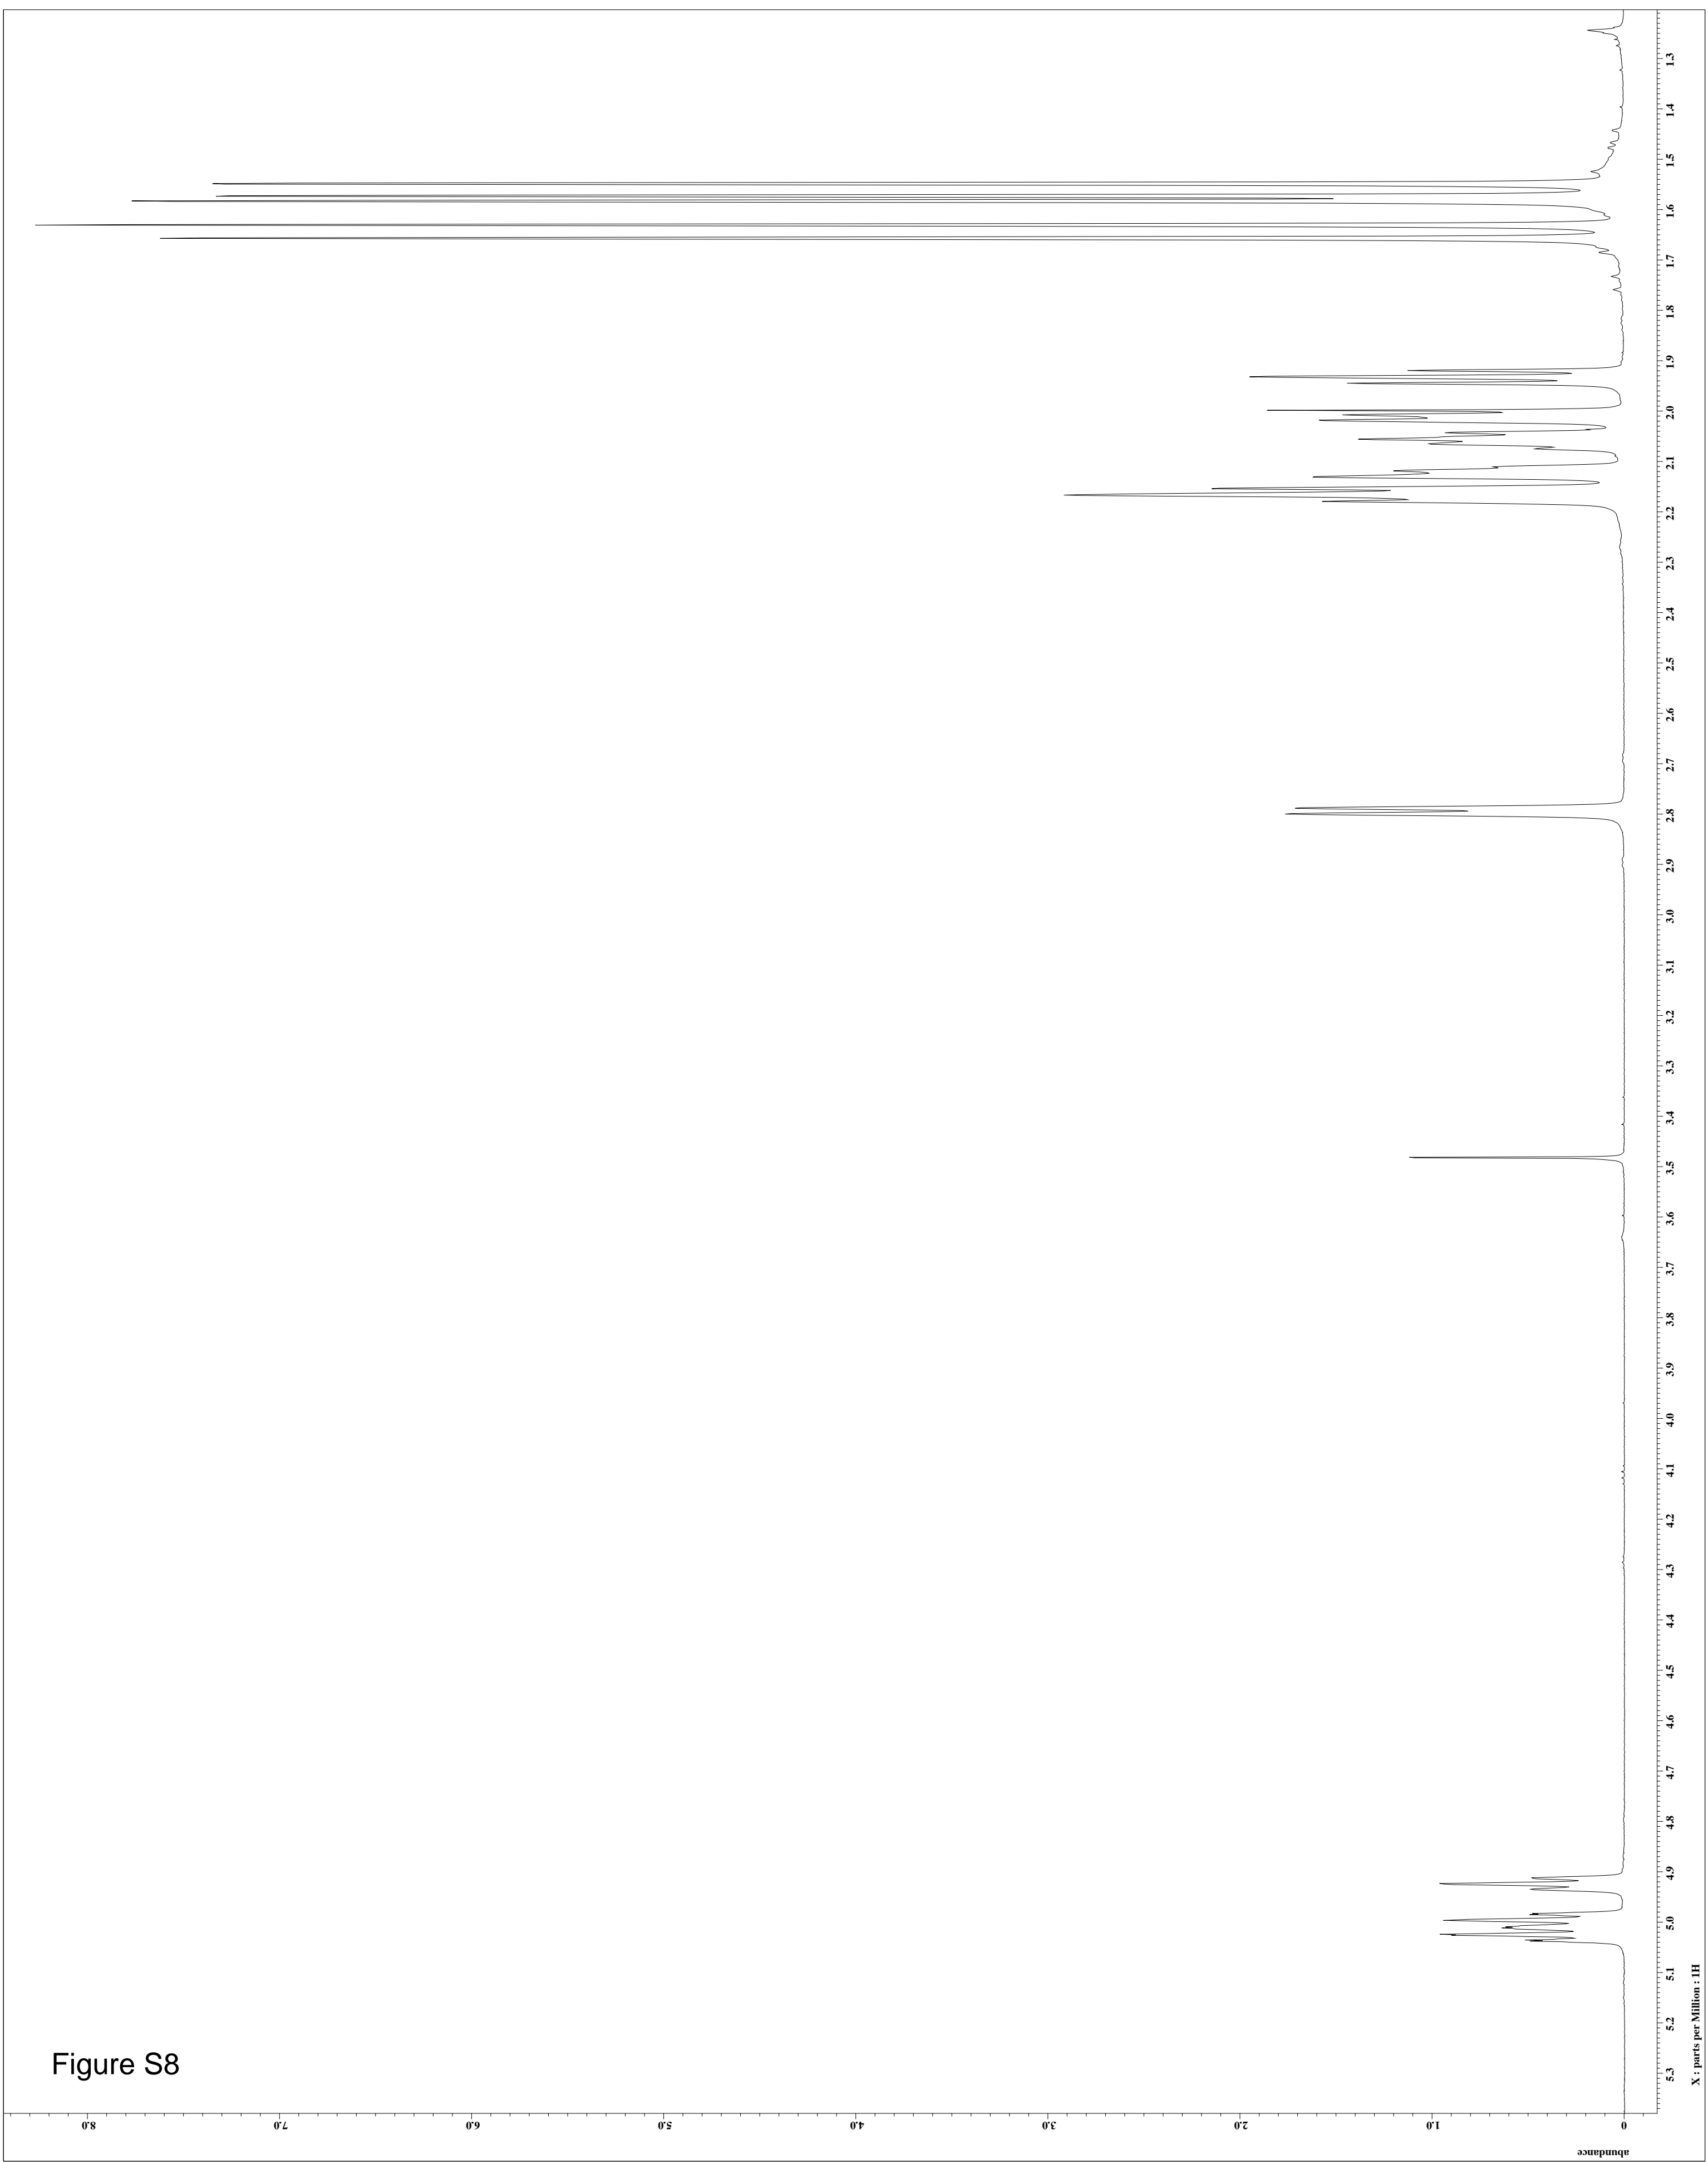

Figure S8



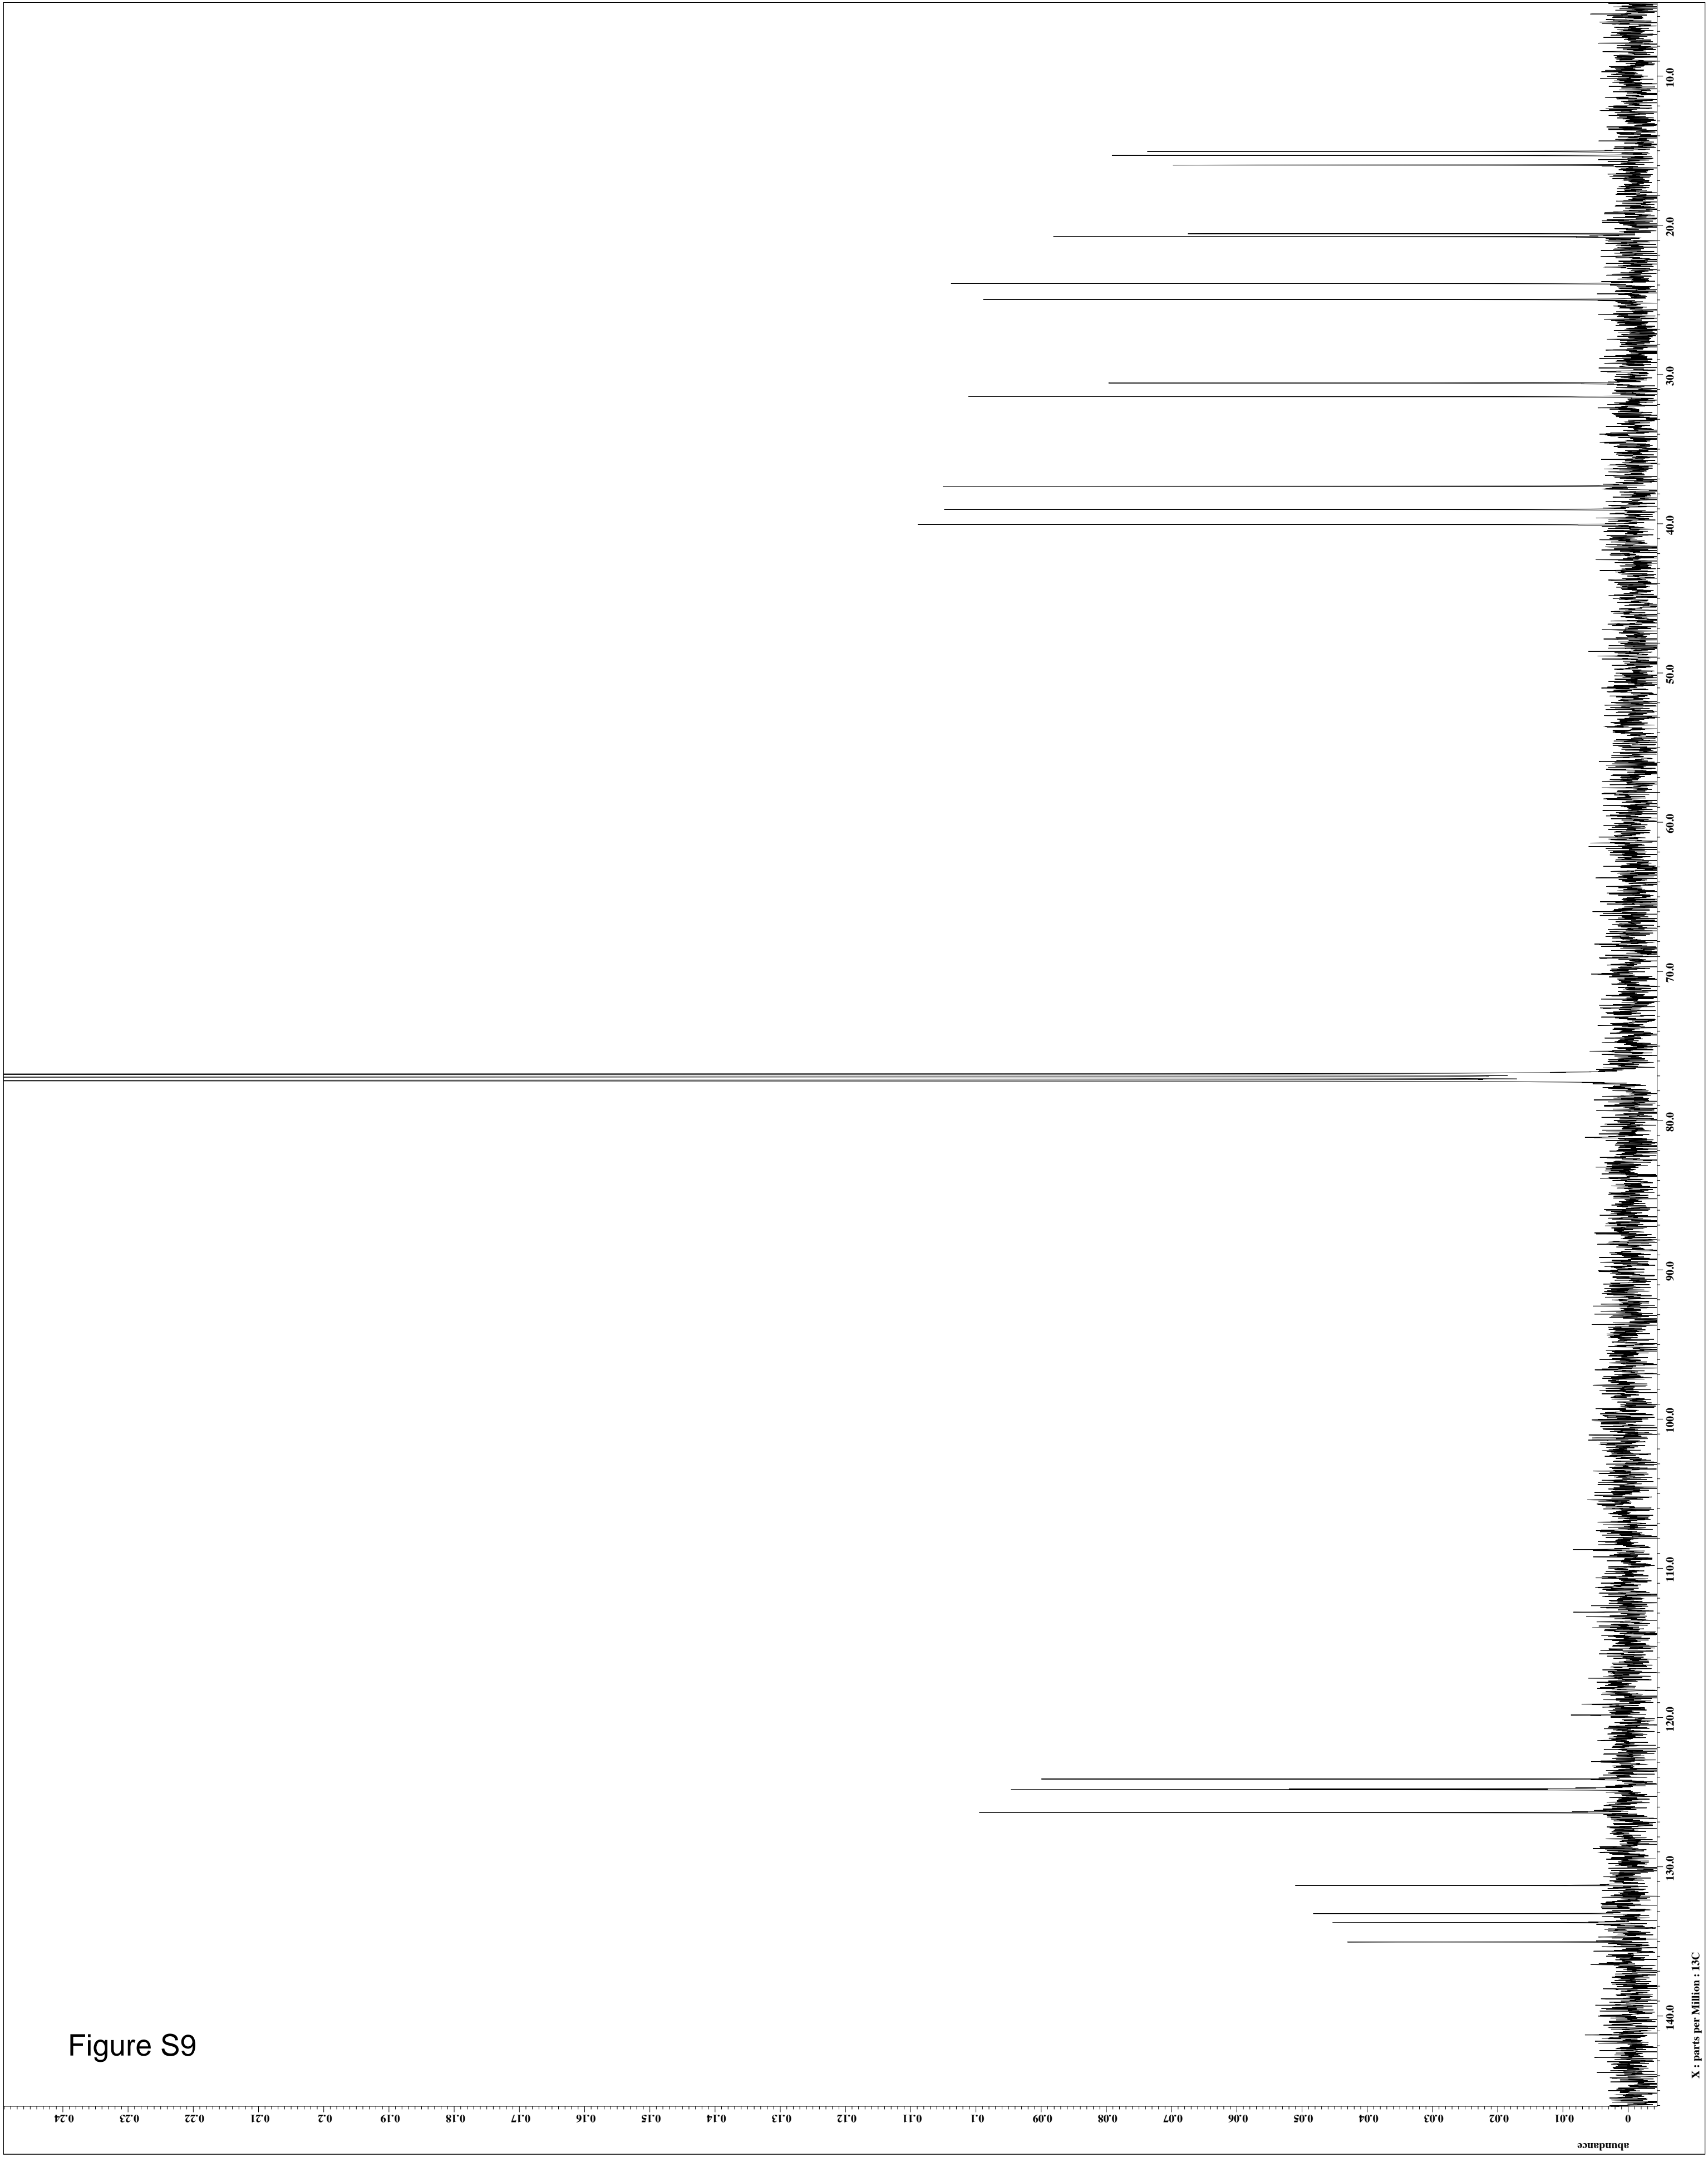

Figure S9

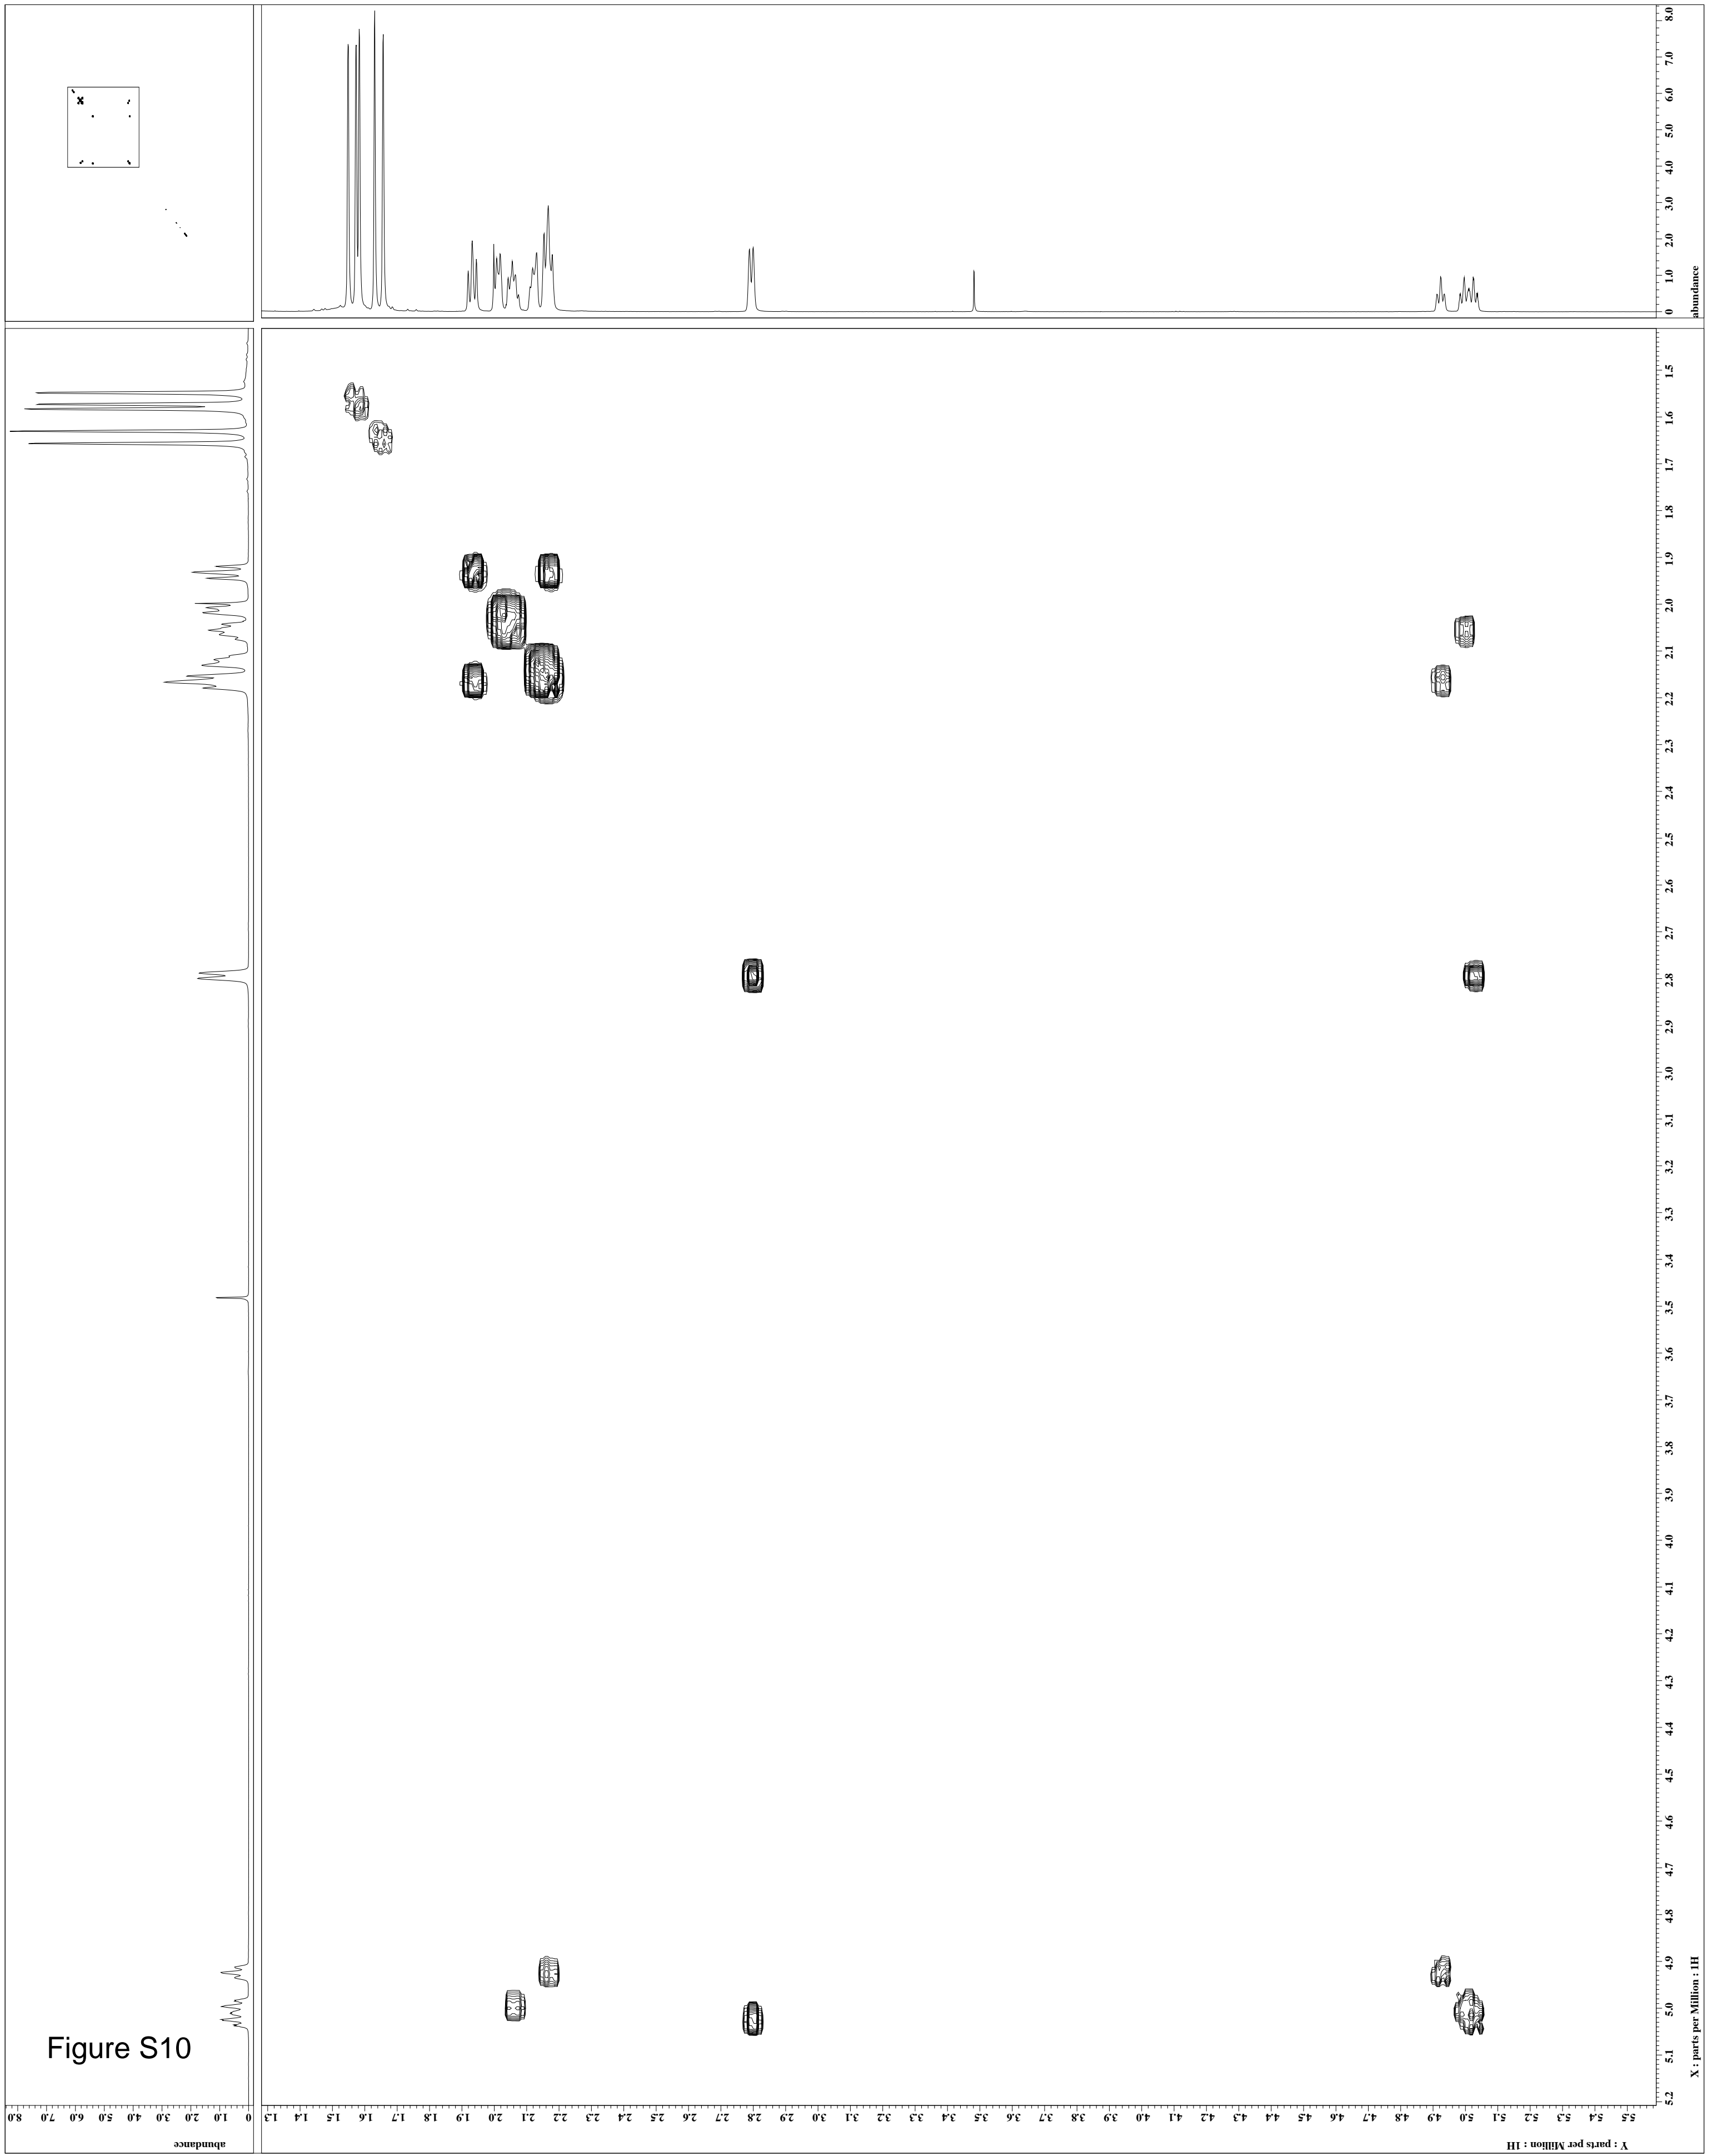

Figure S10

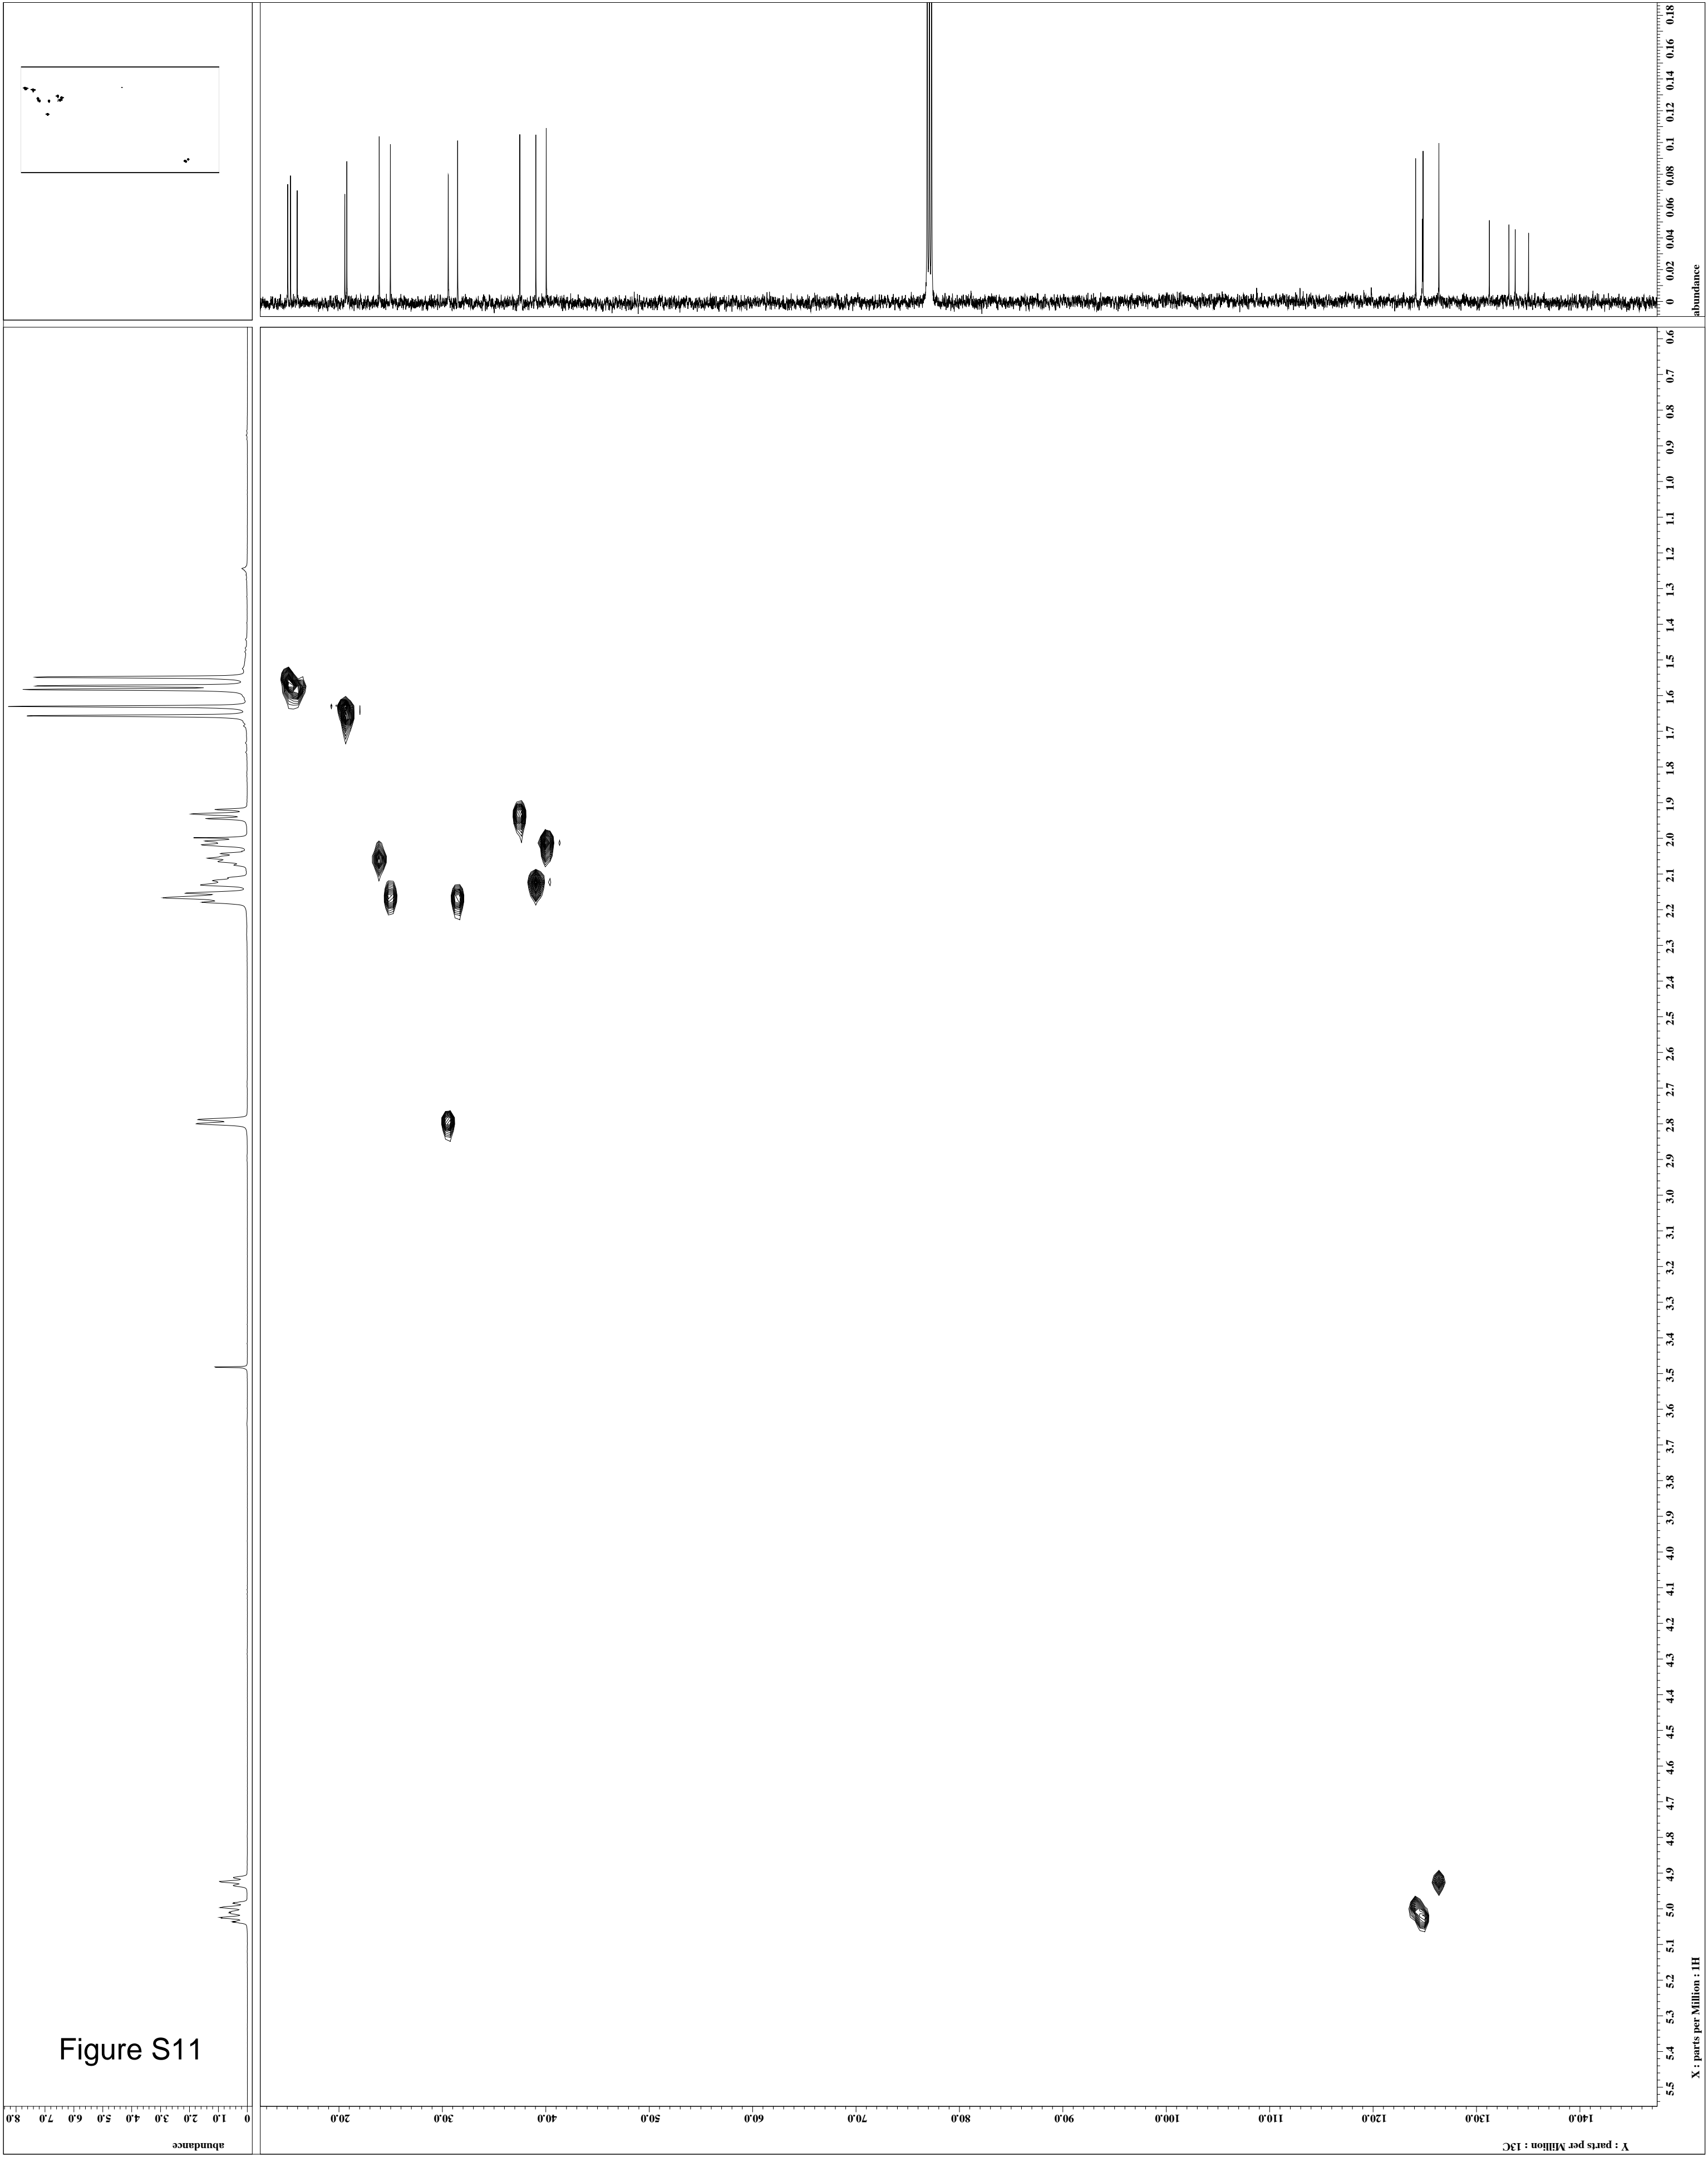

Figure S11

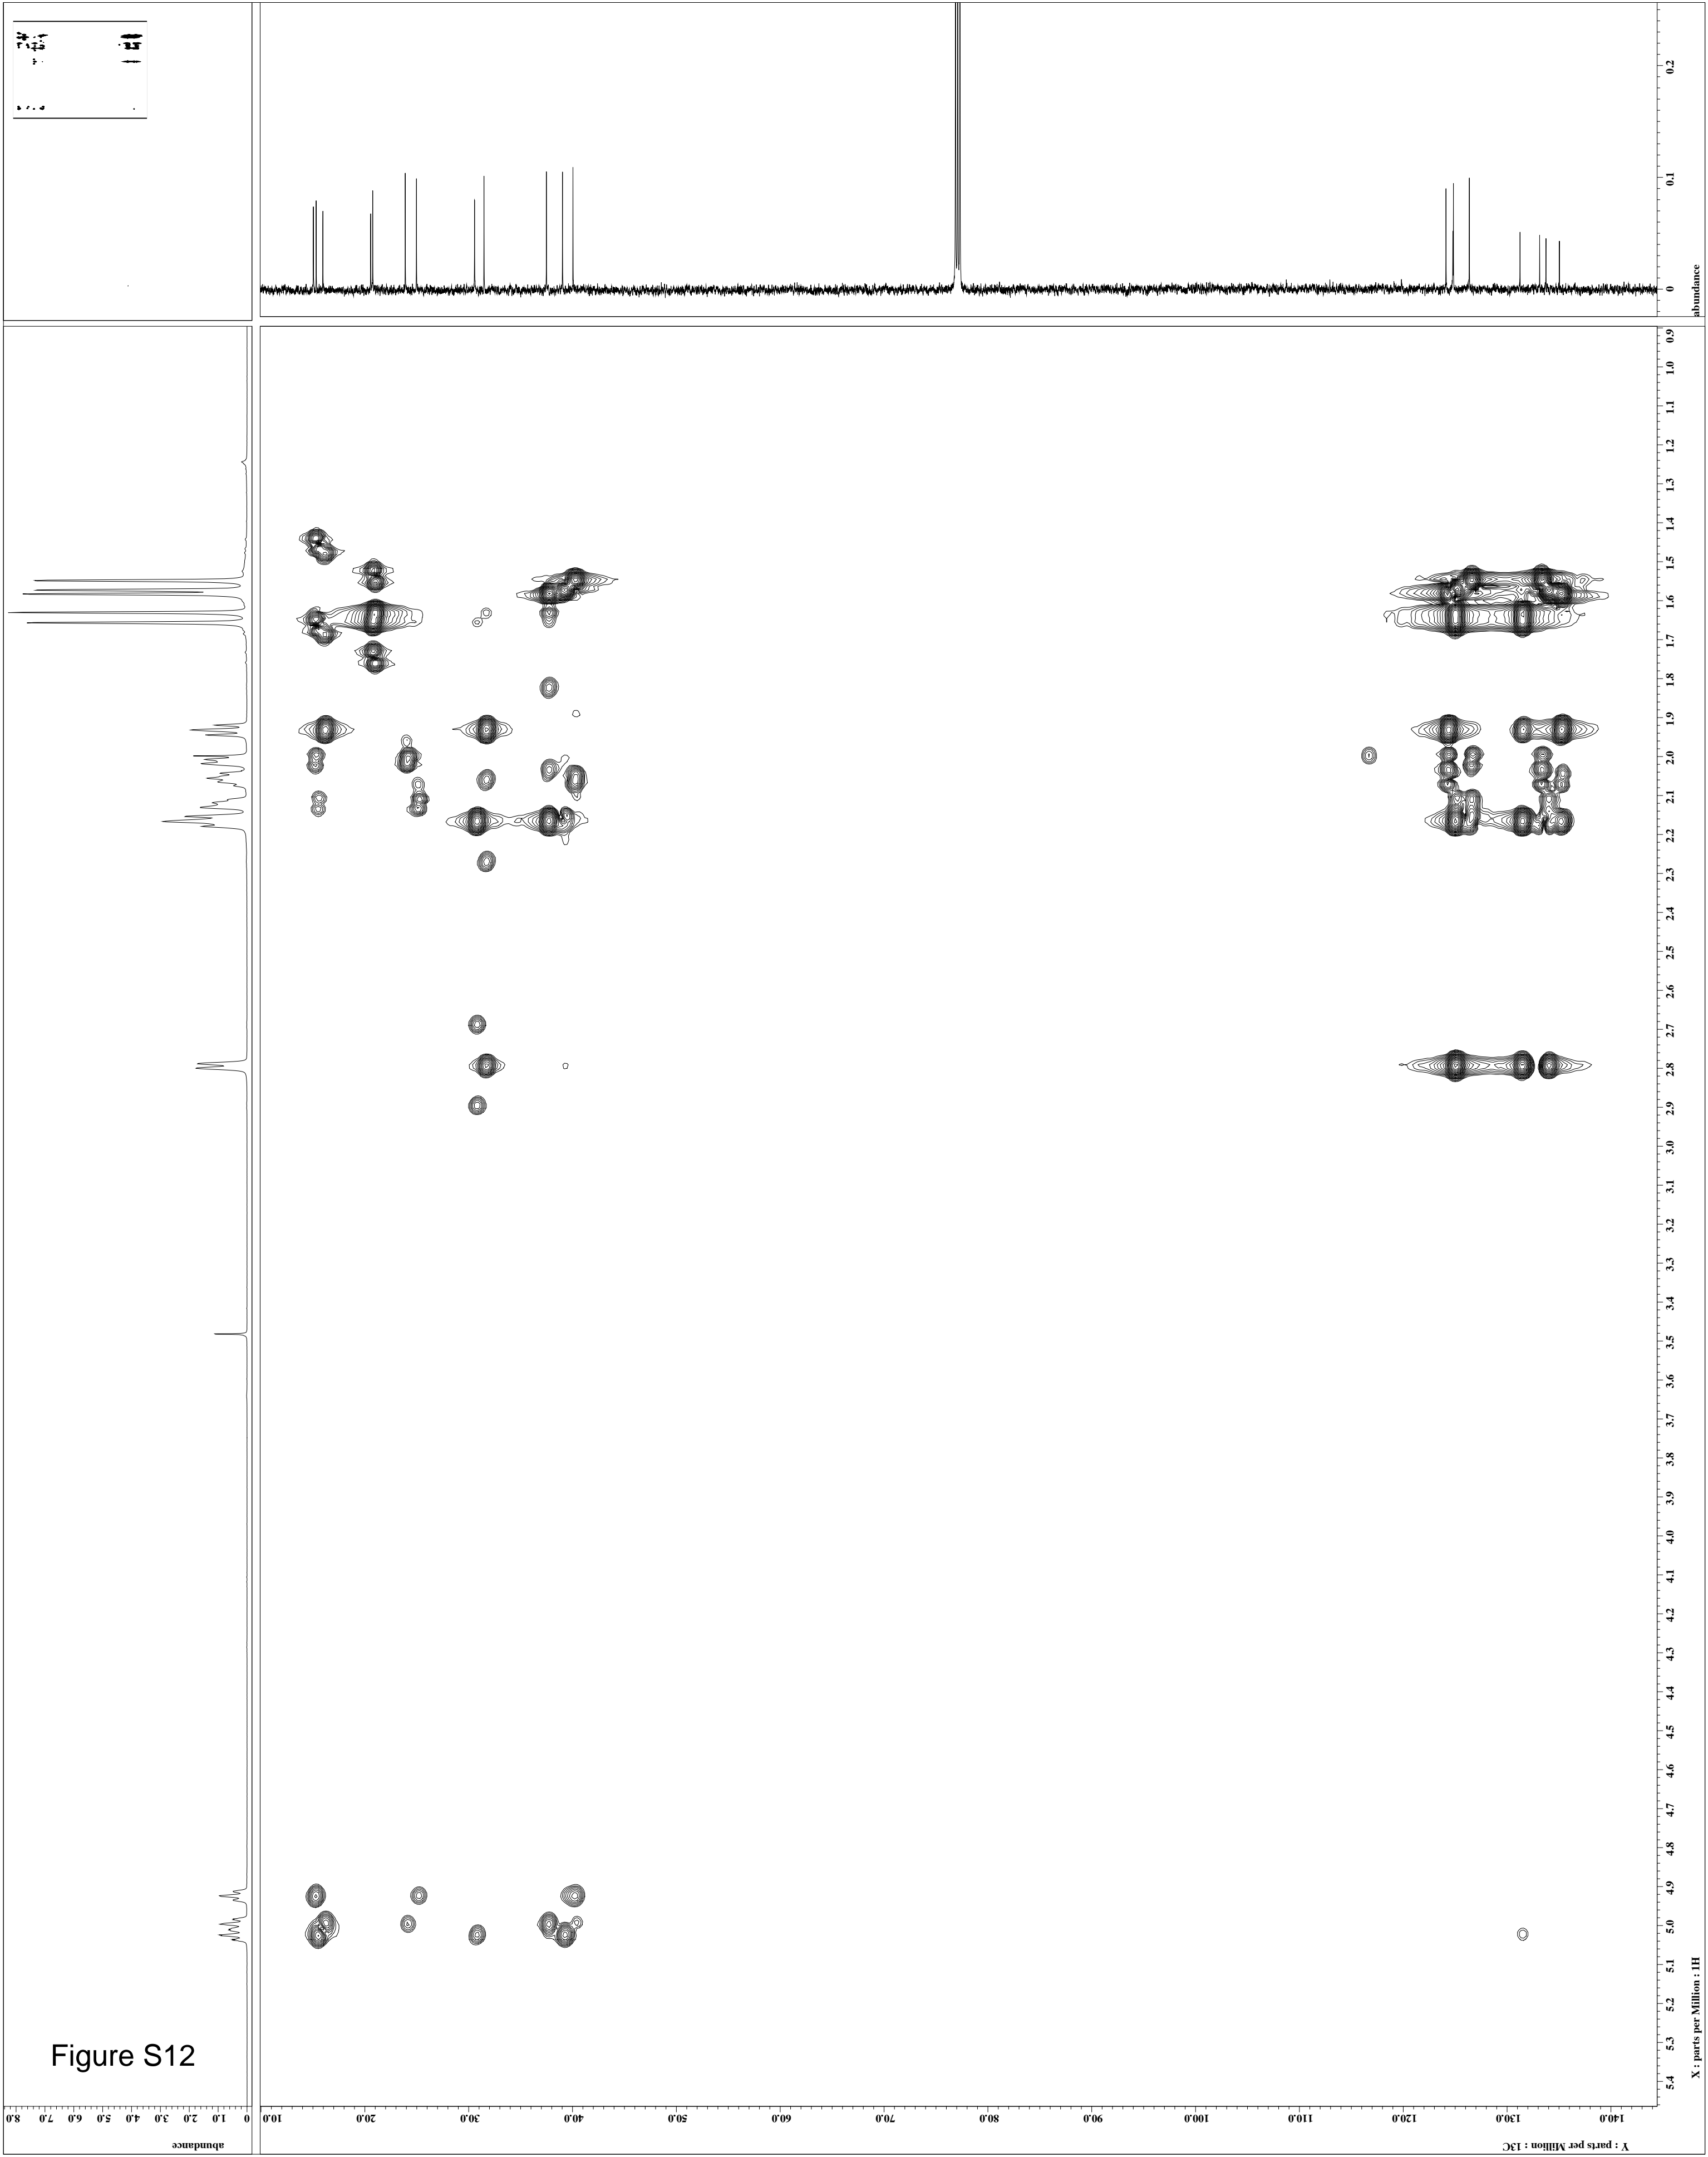

Figure S12

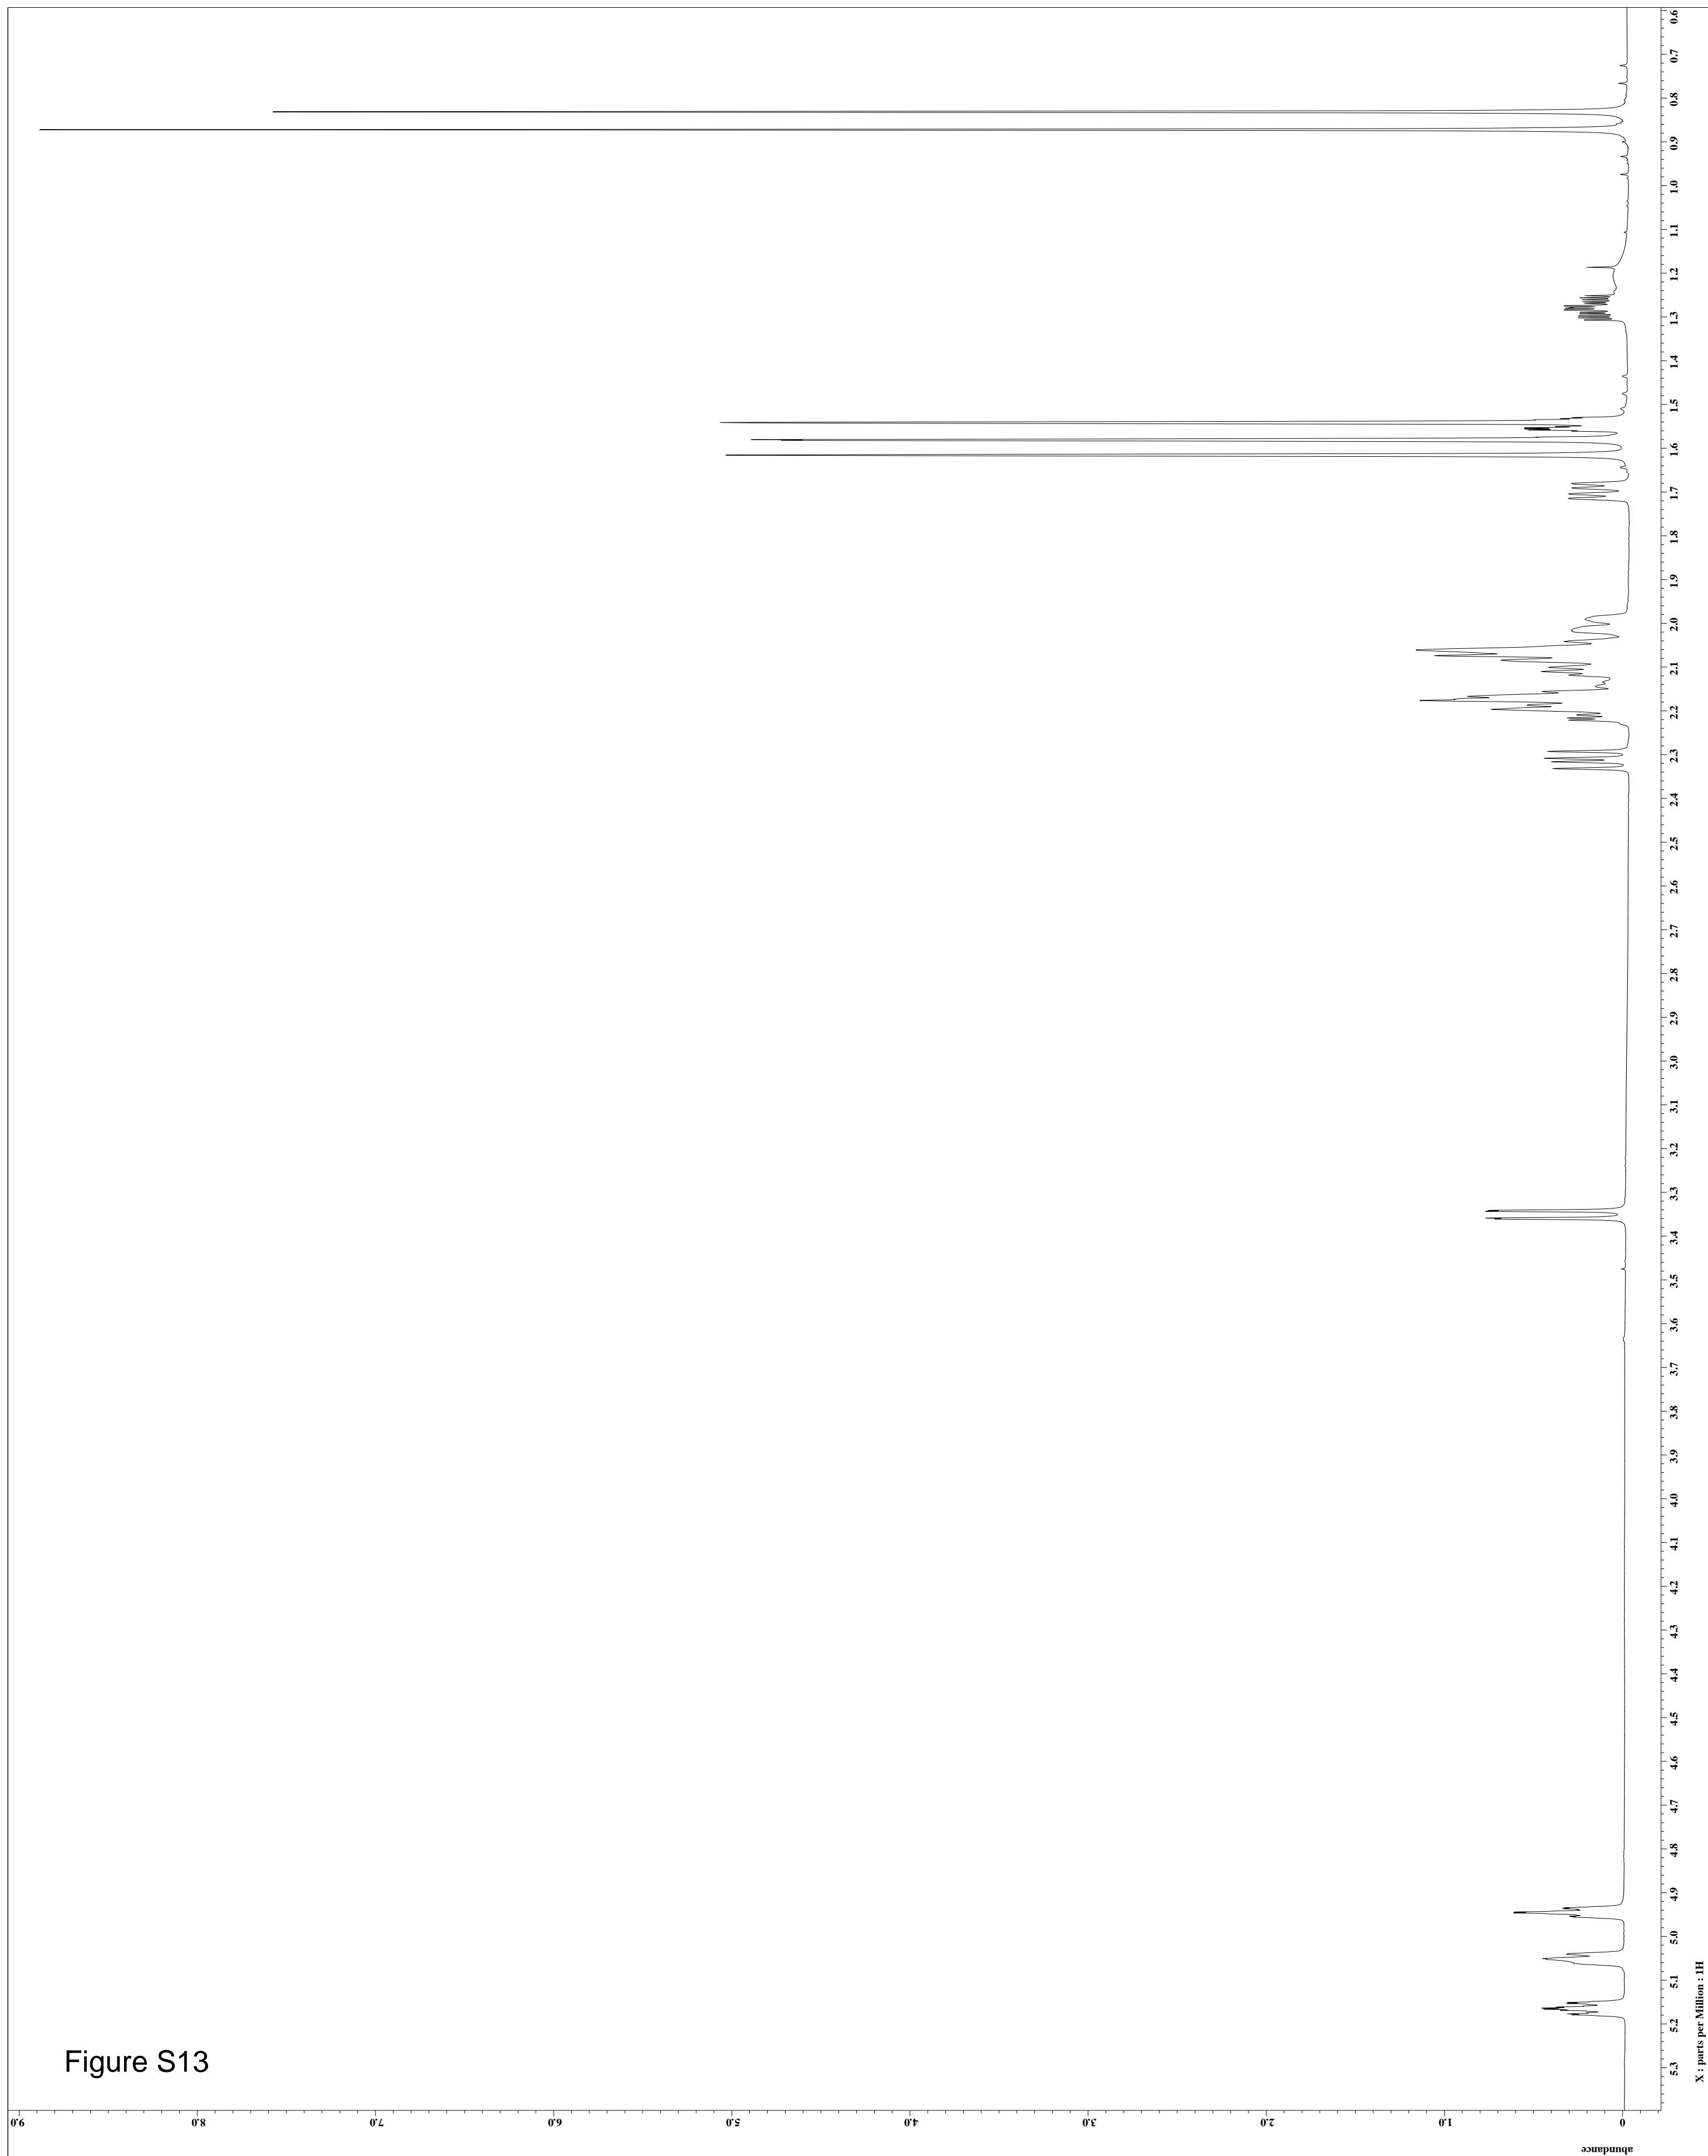

Figure S13

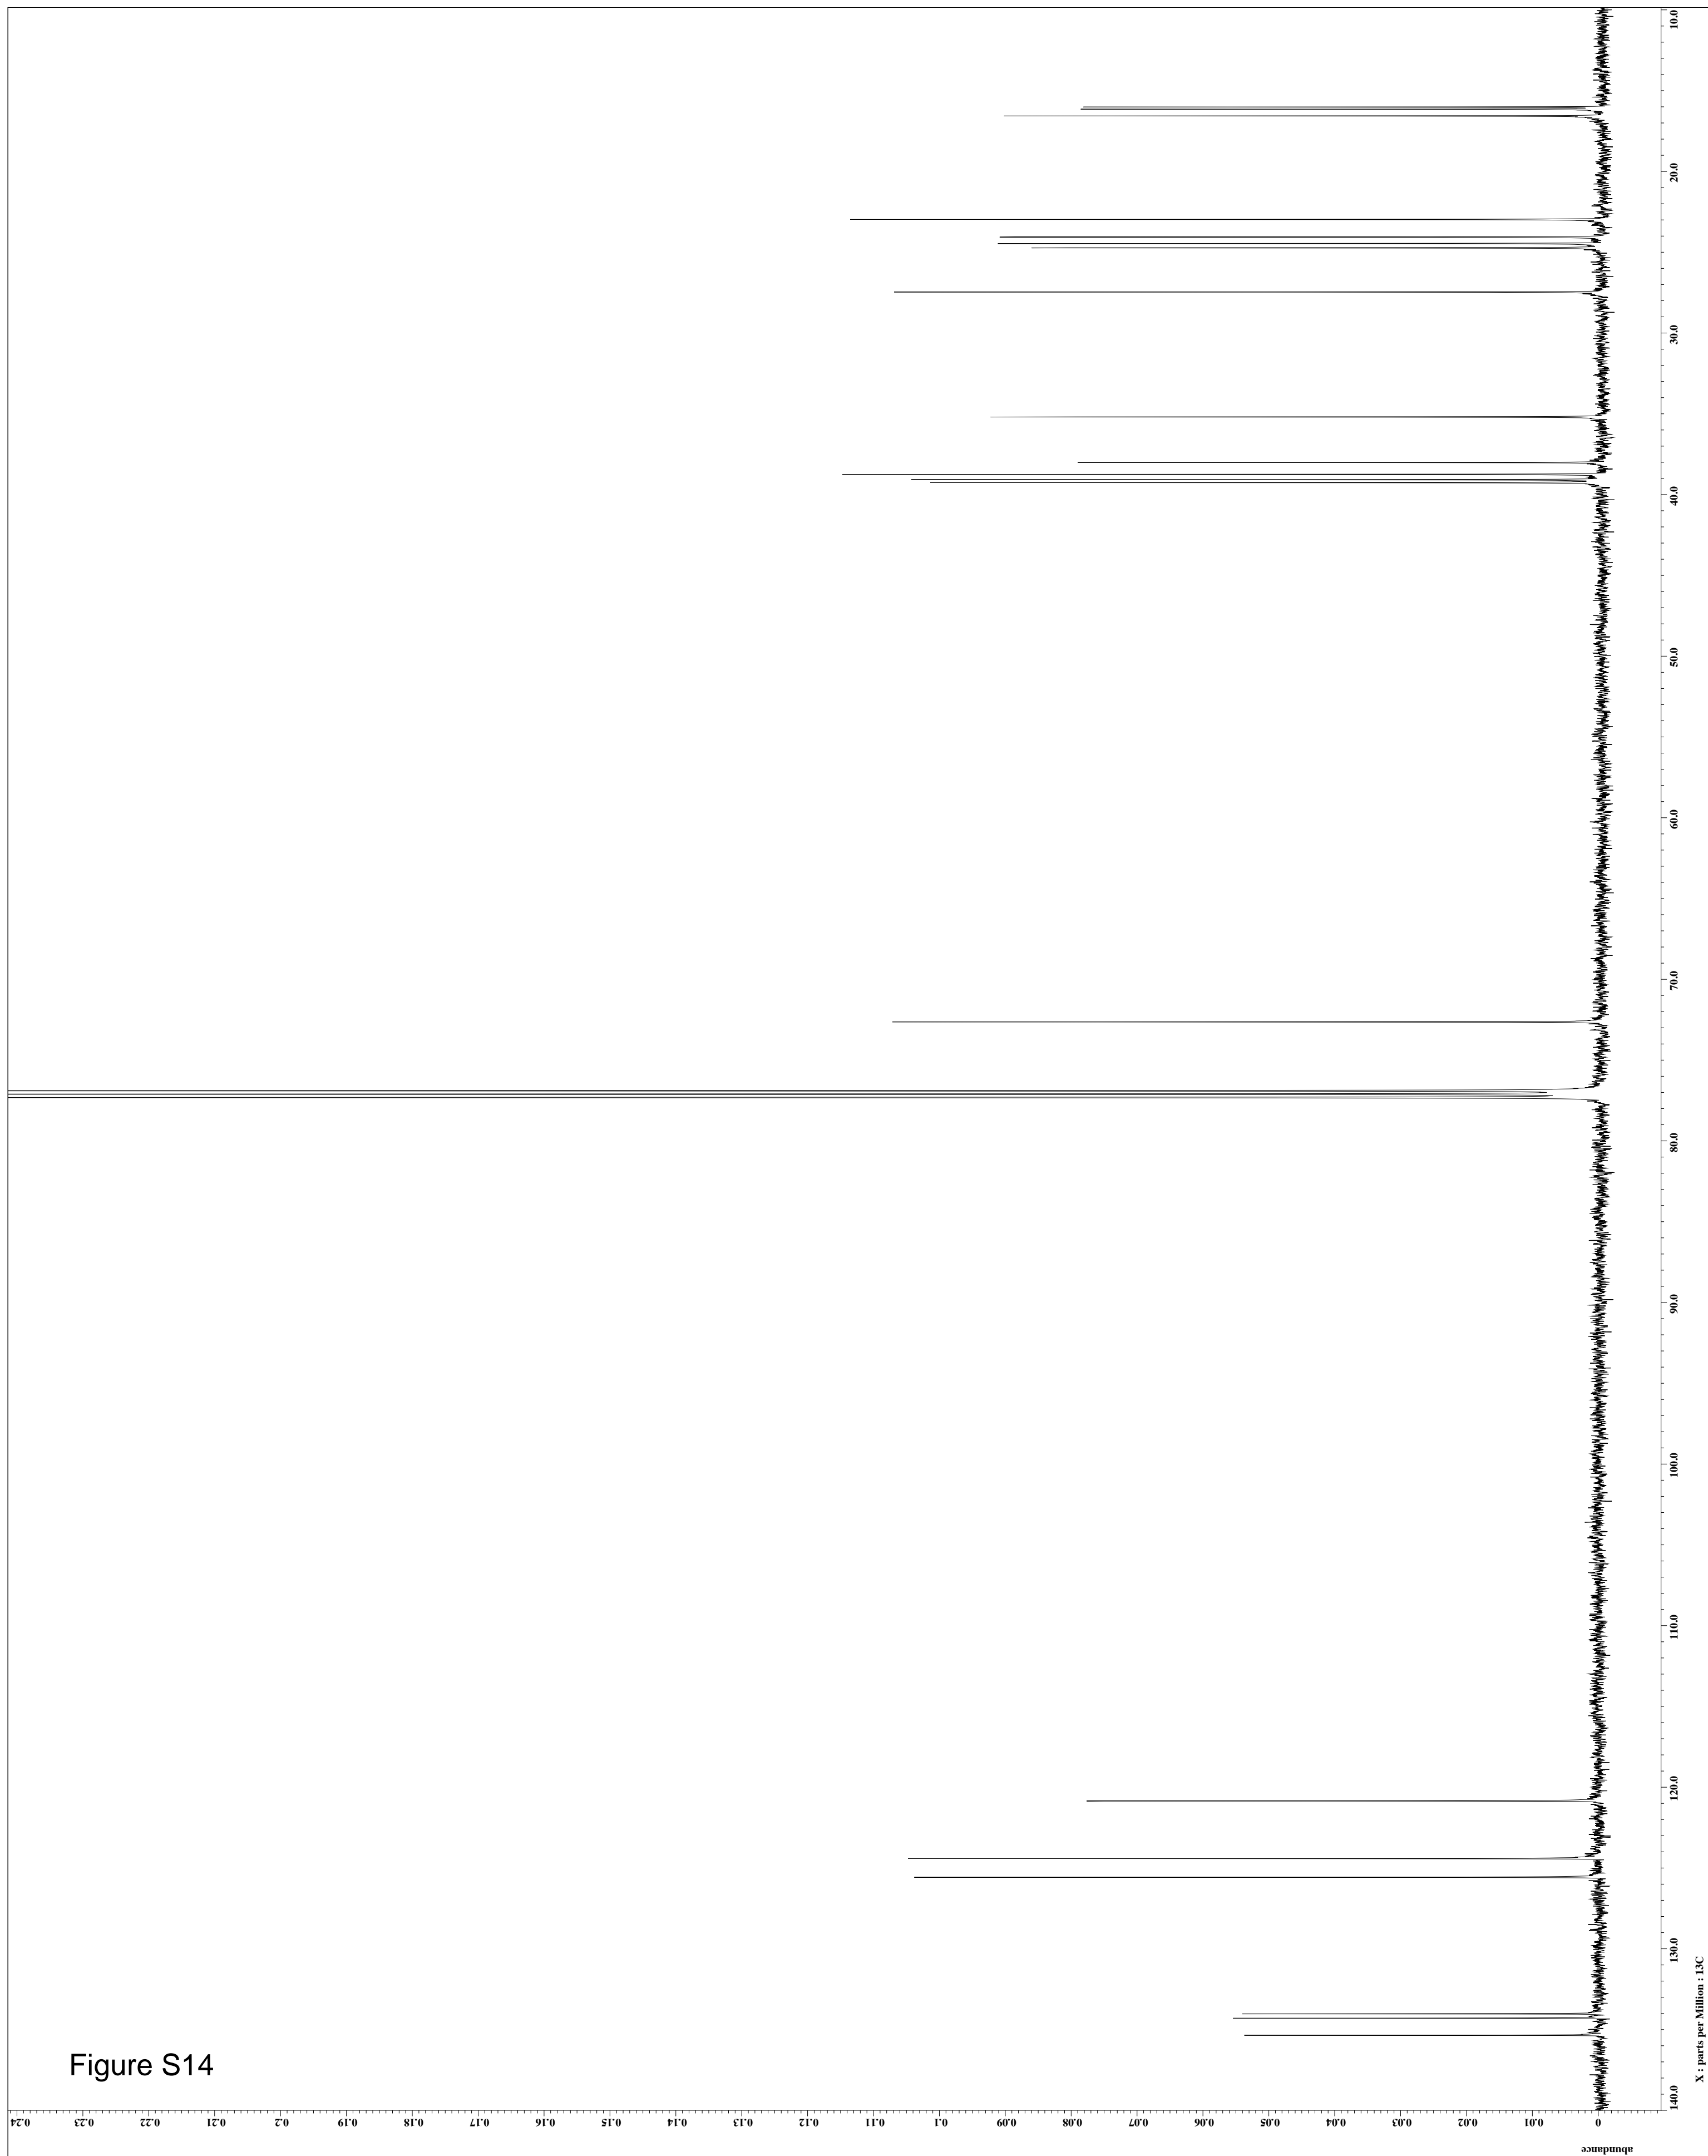

Figure S14

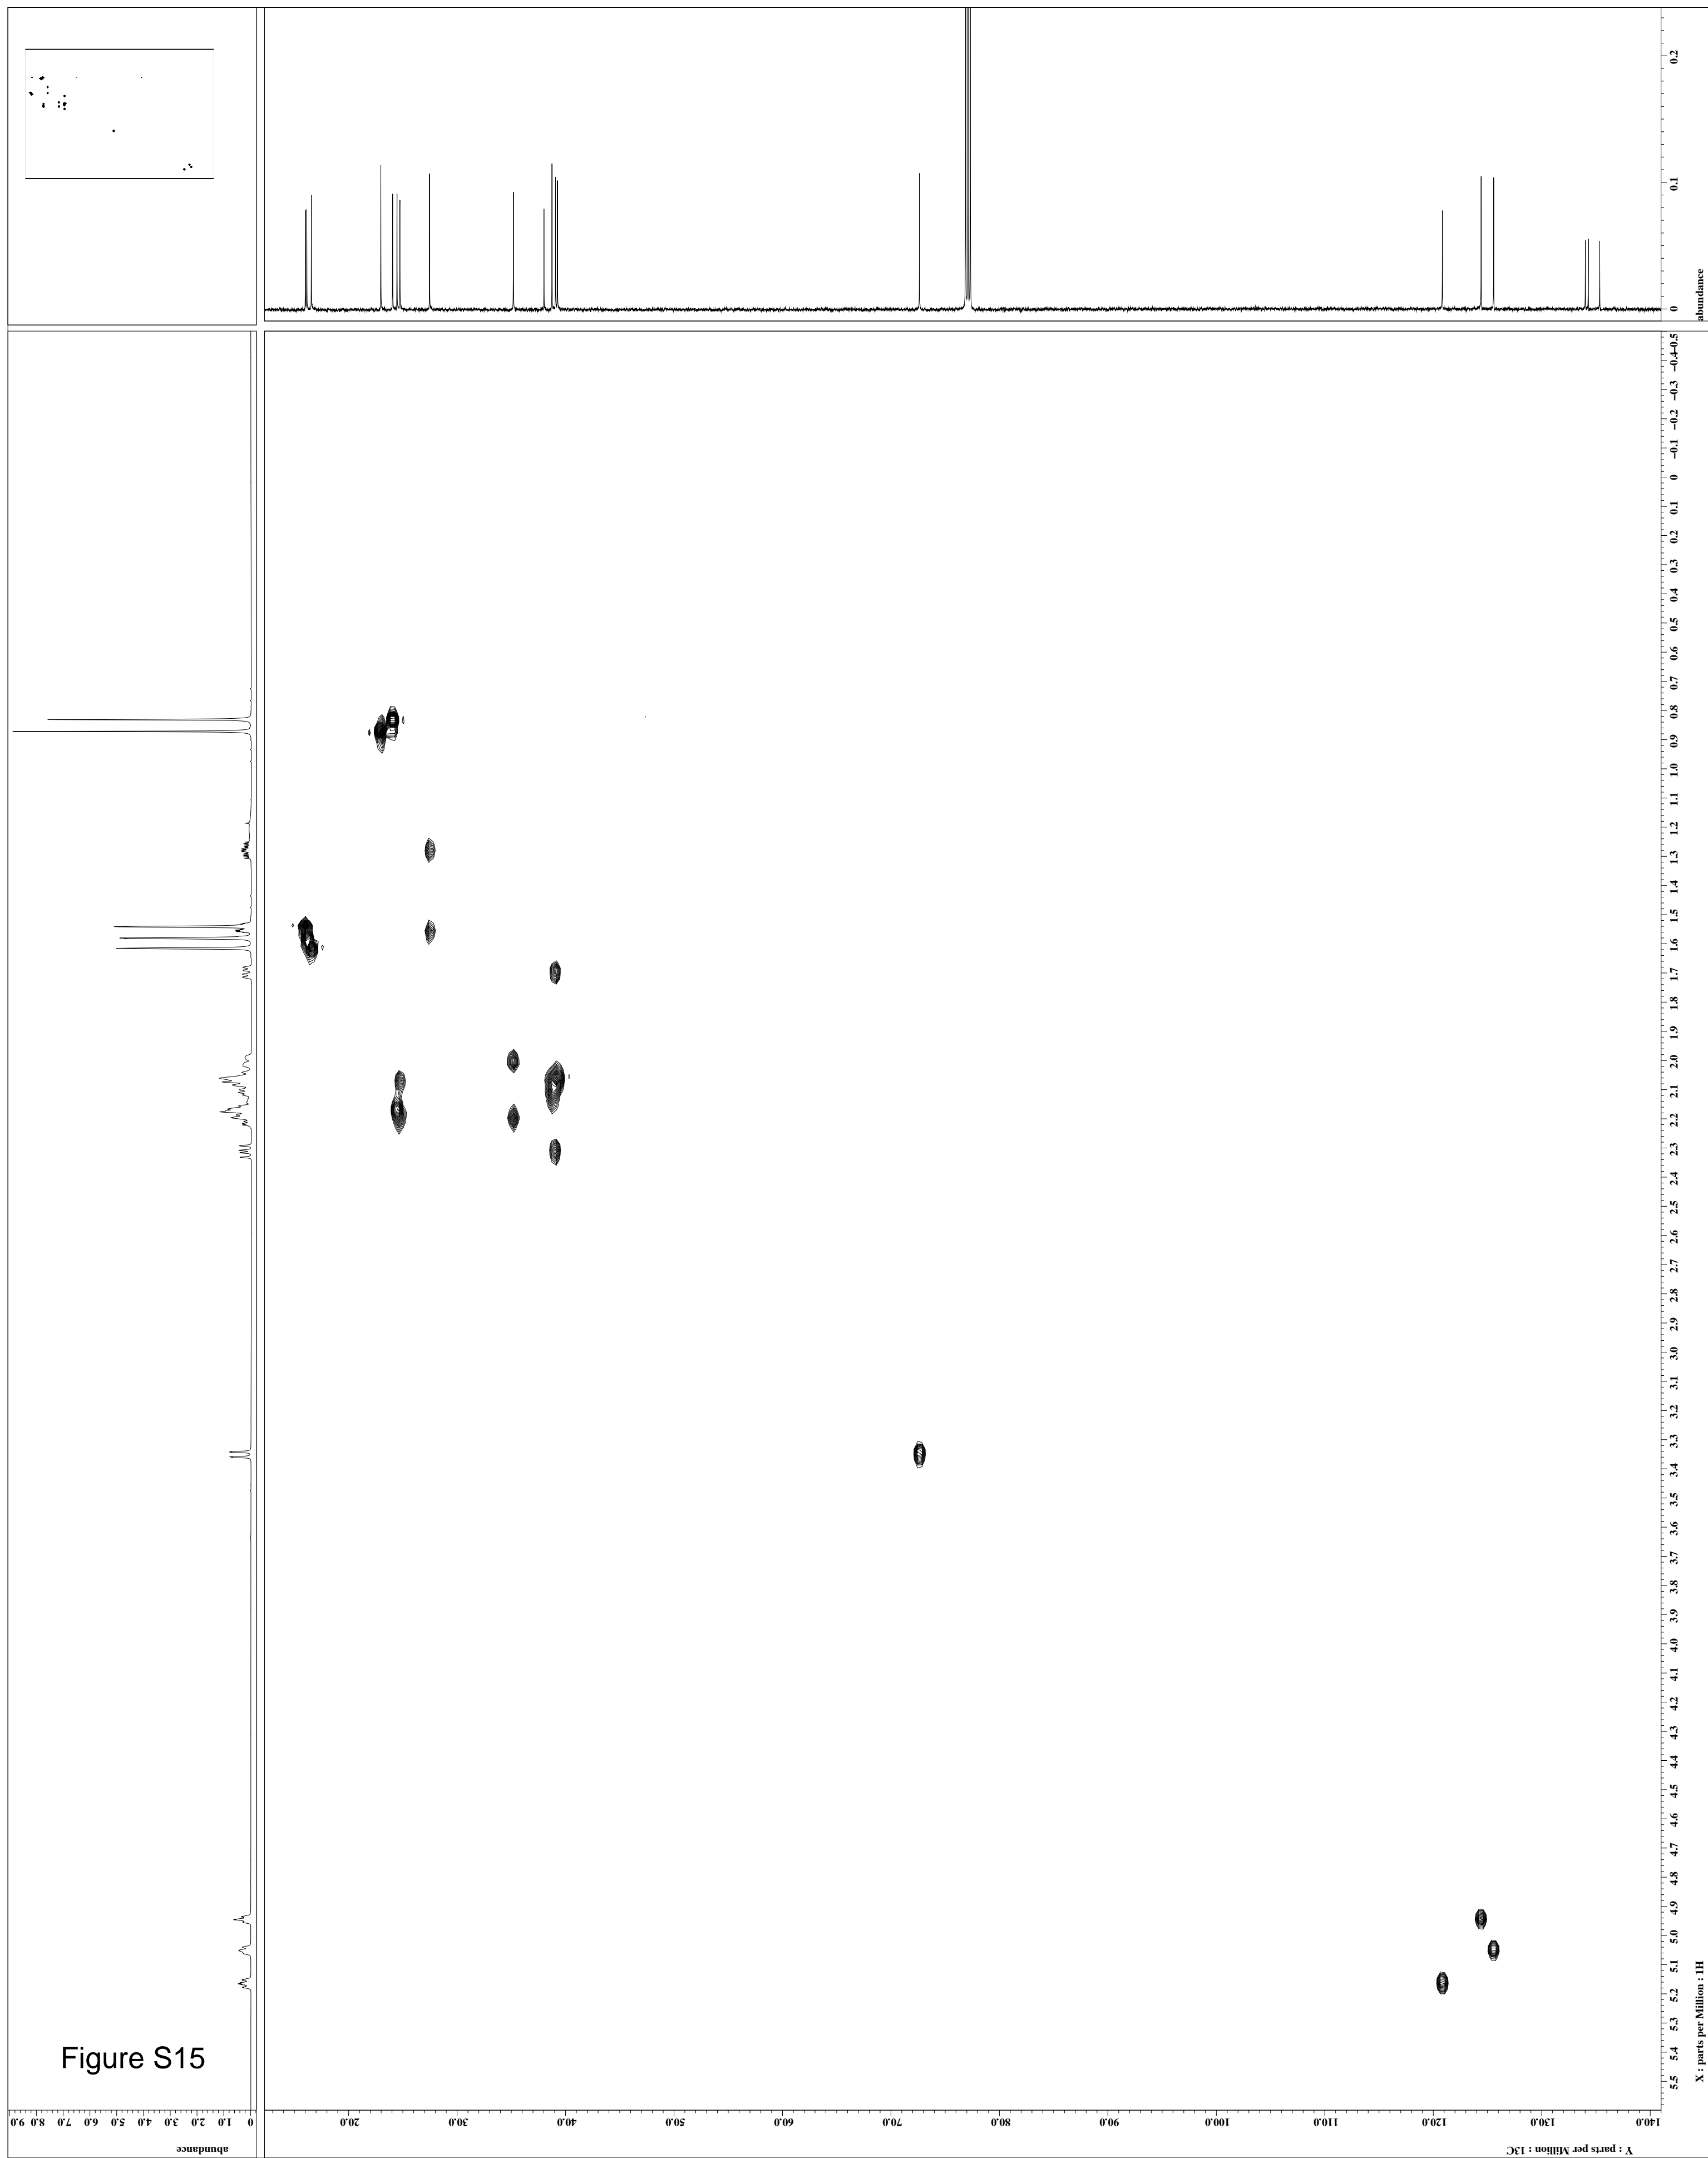

Figure S15

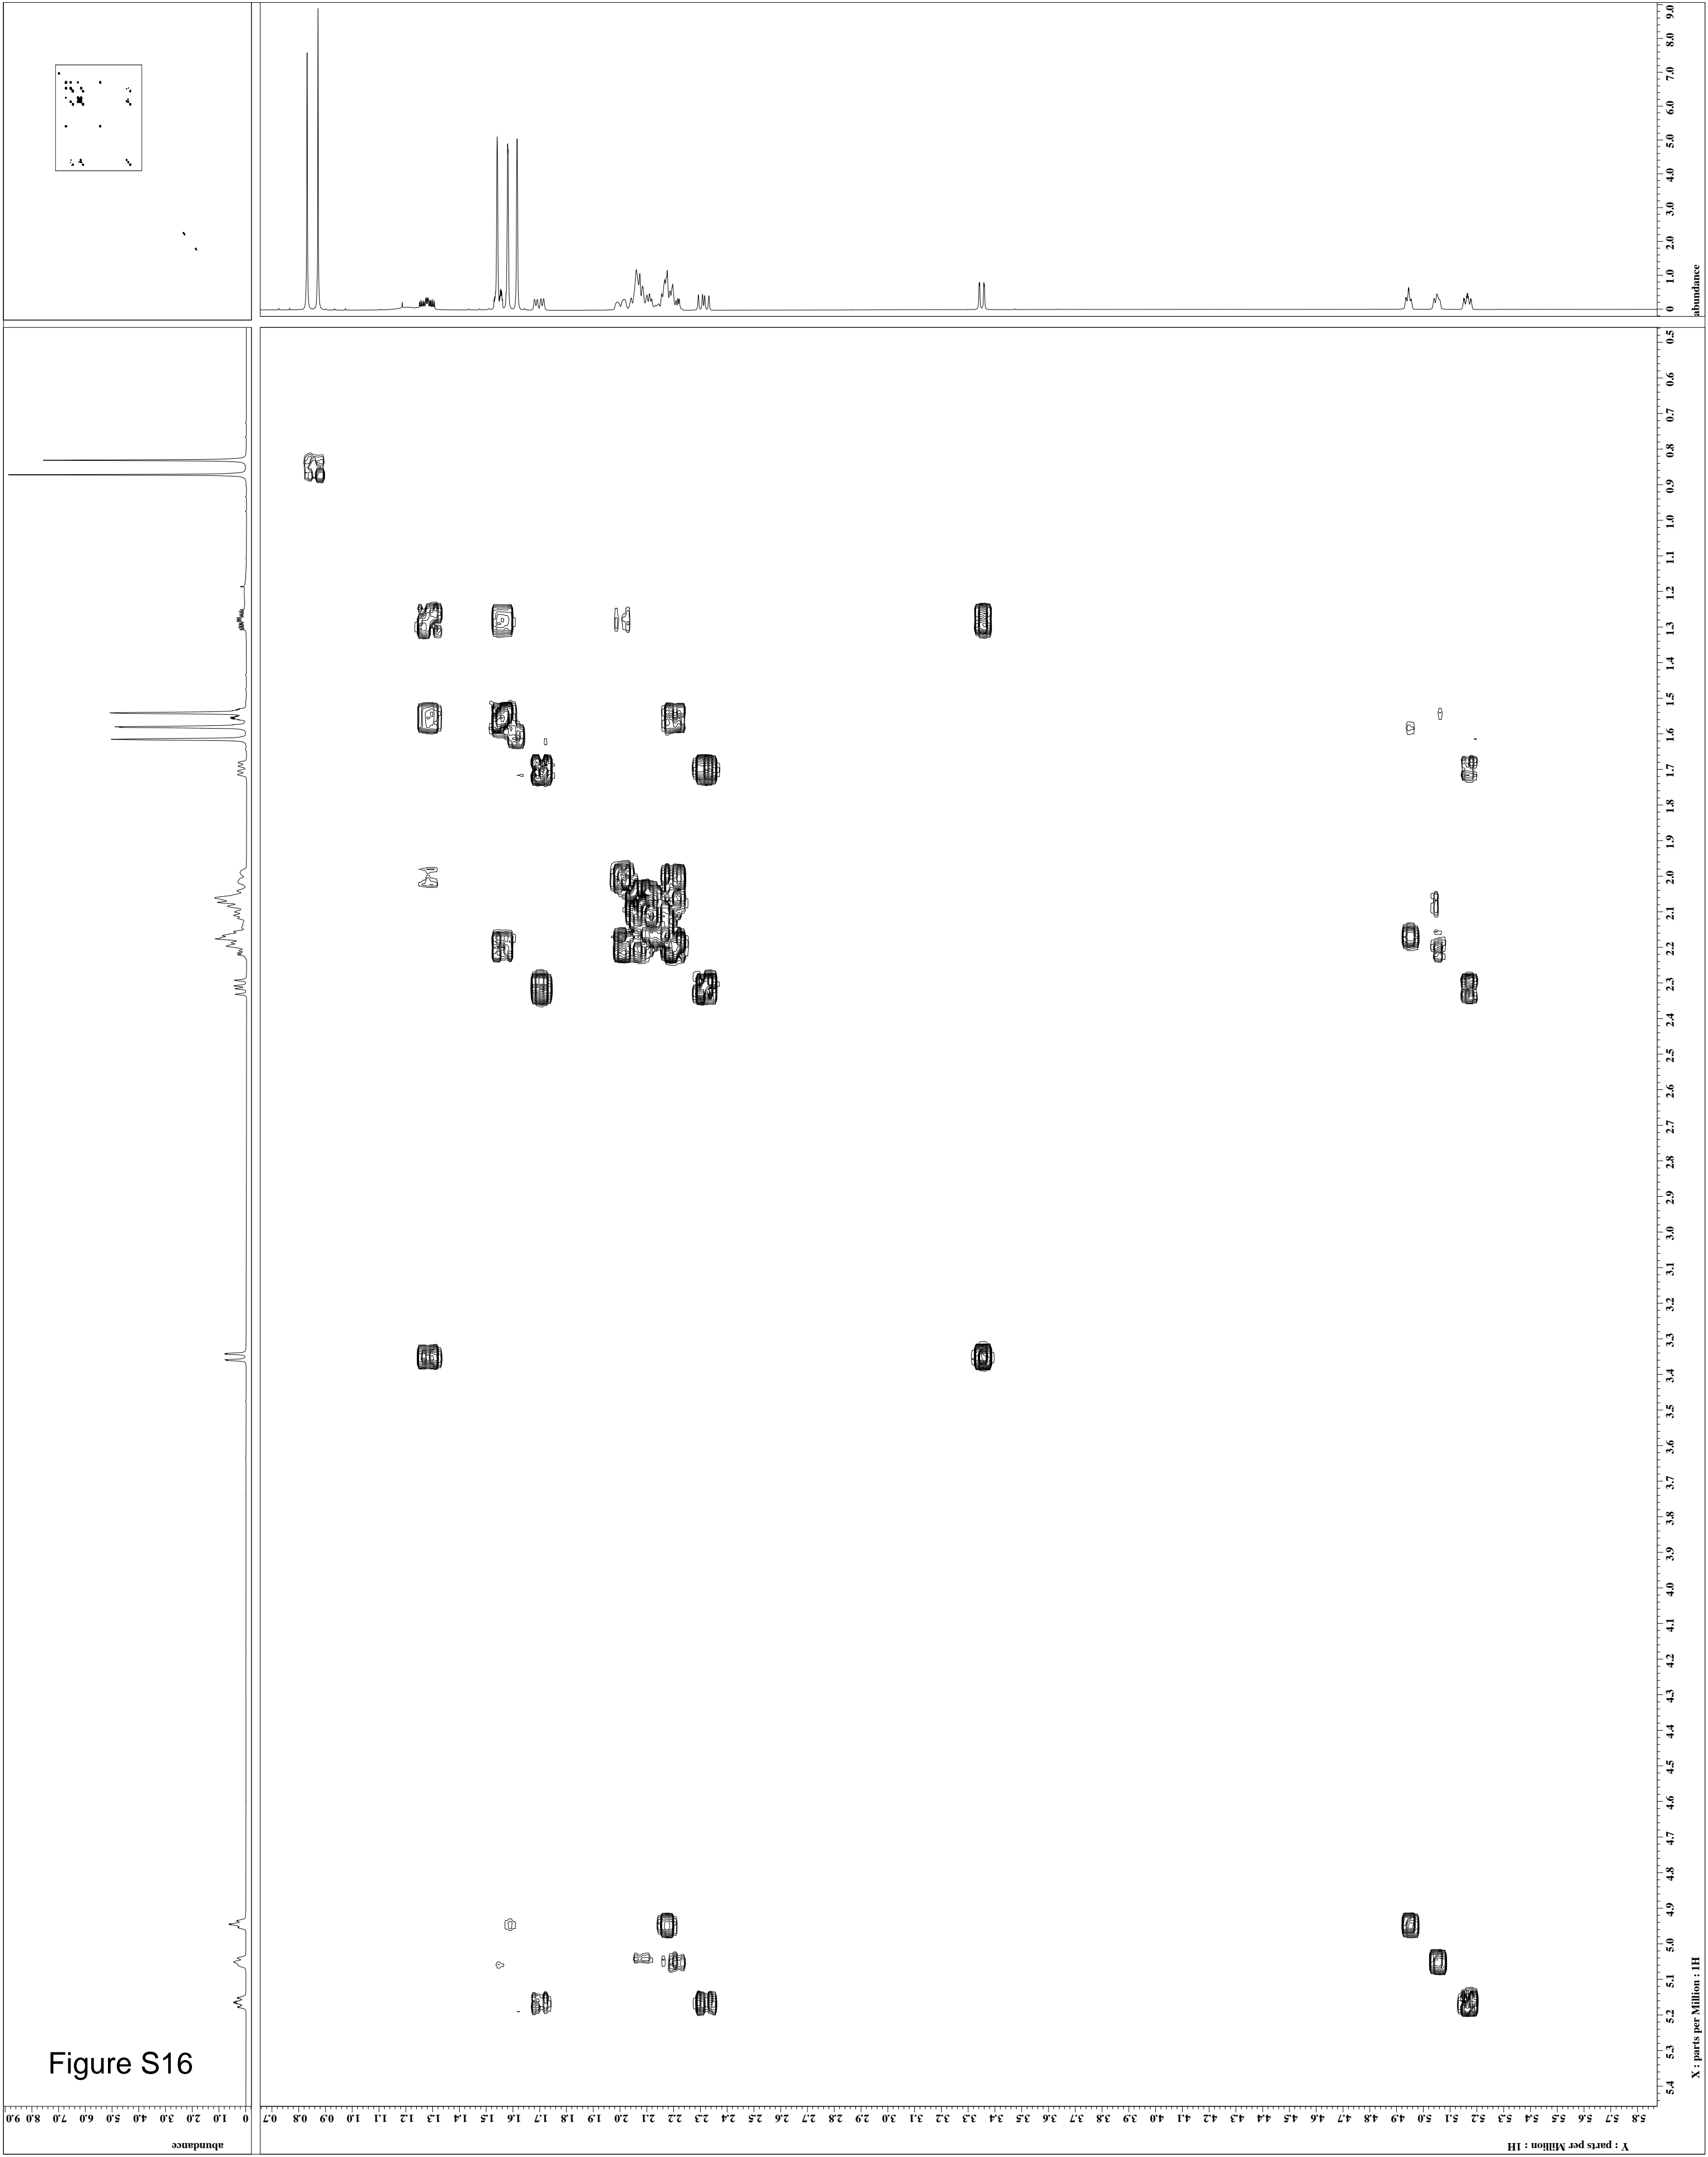

Figure S16



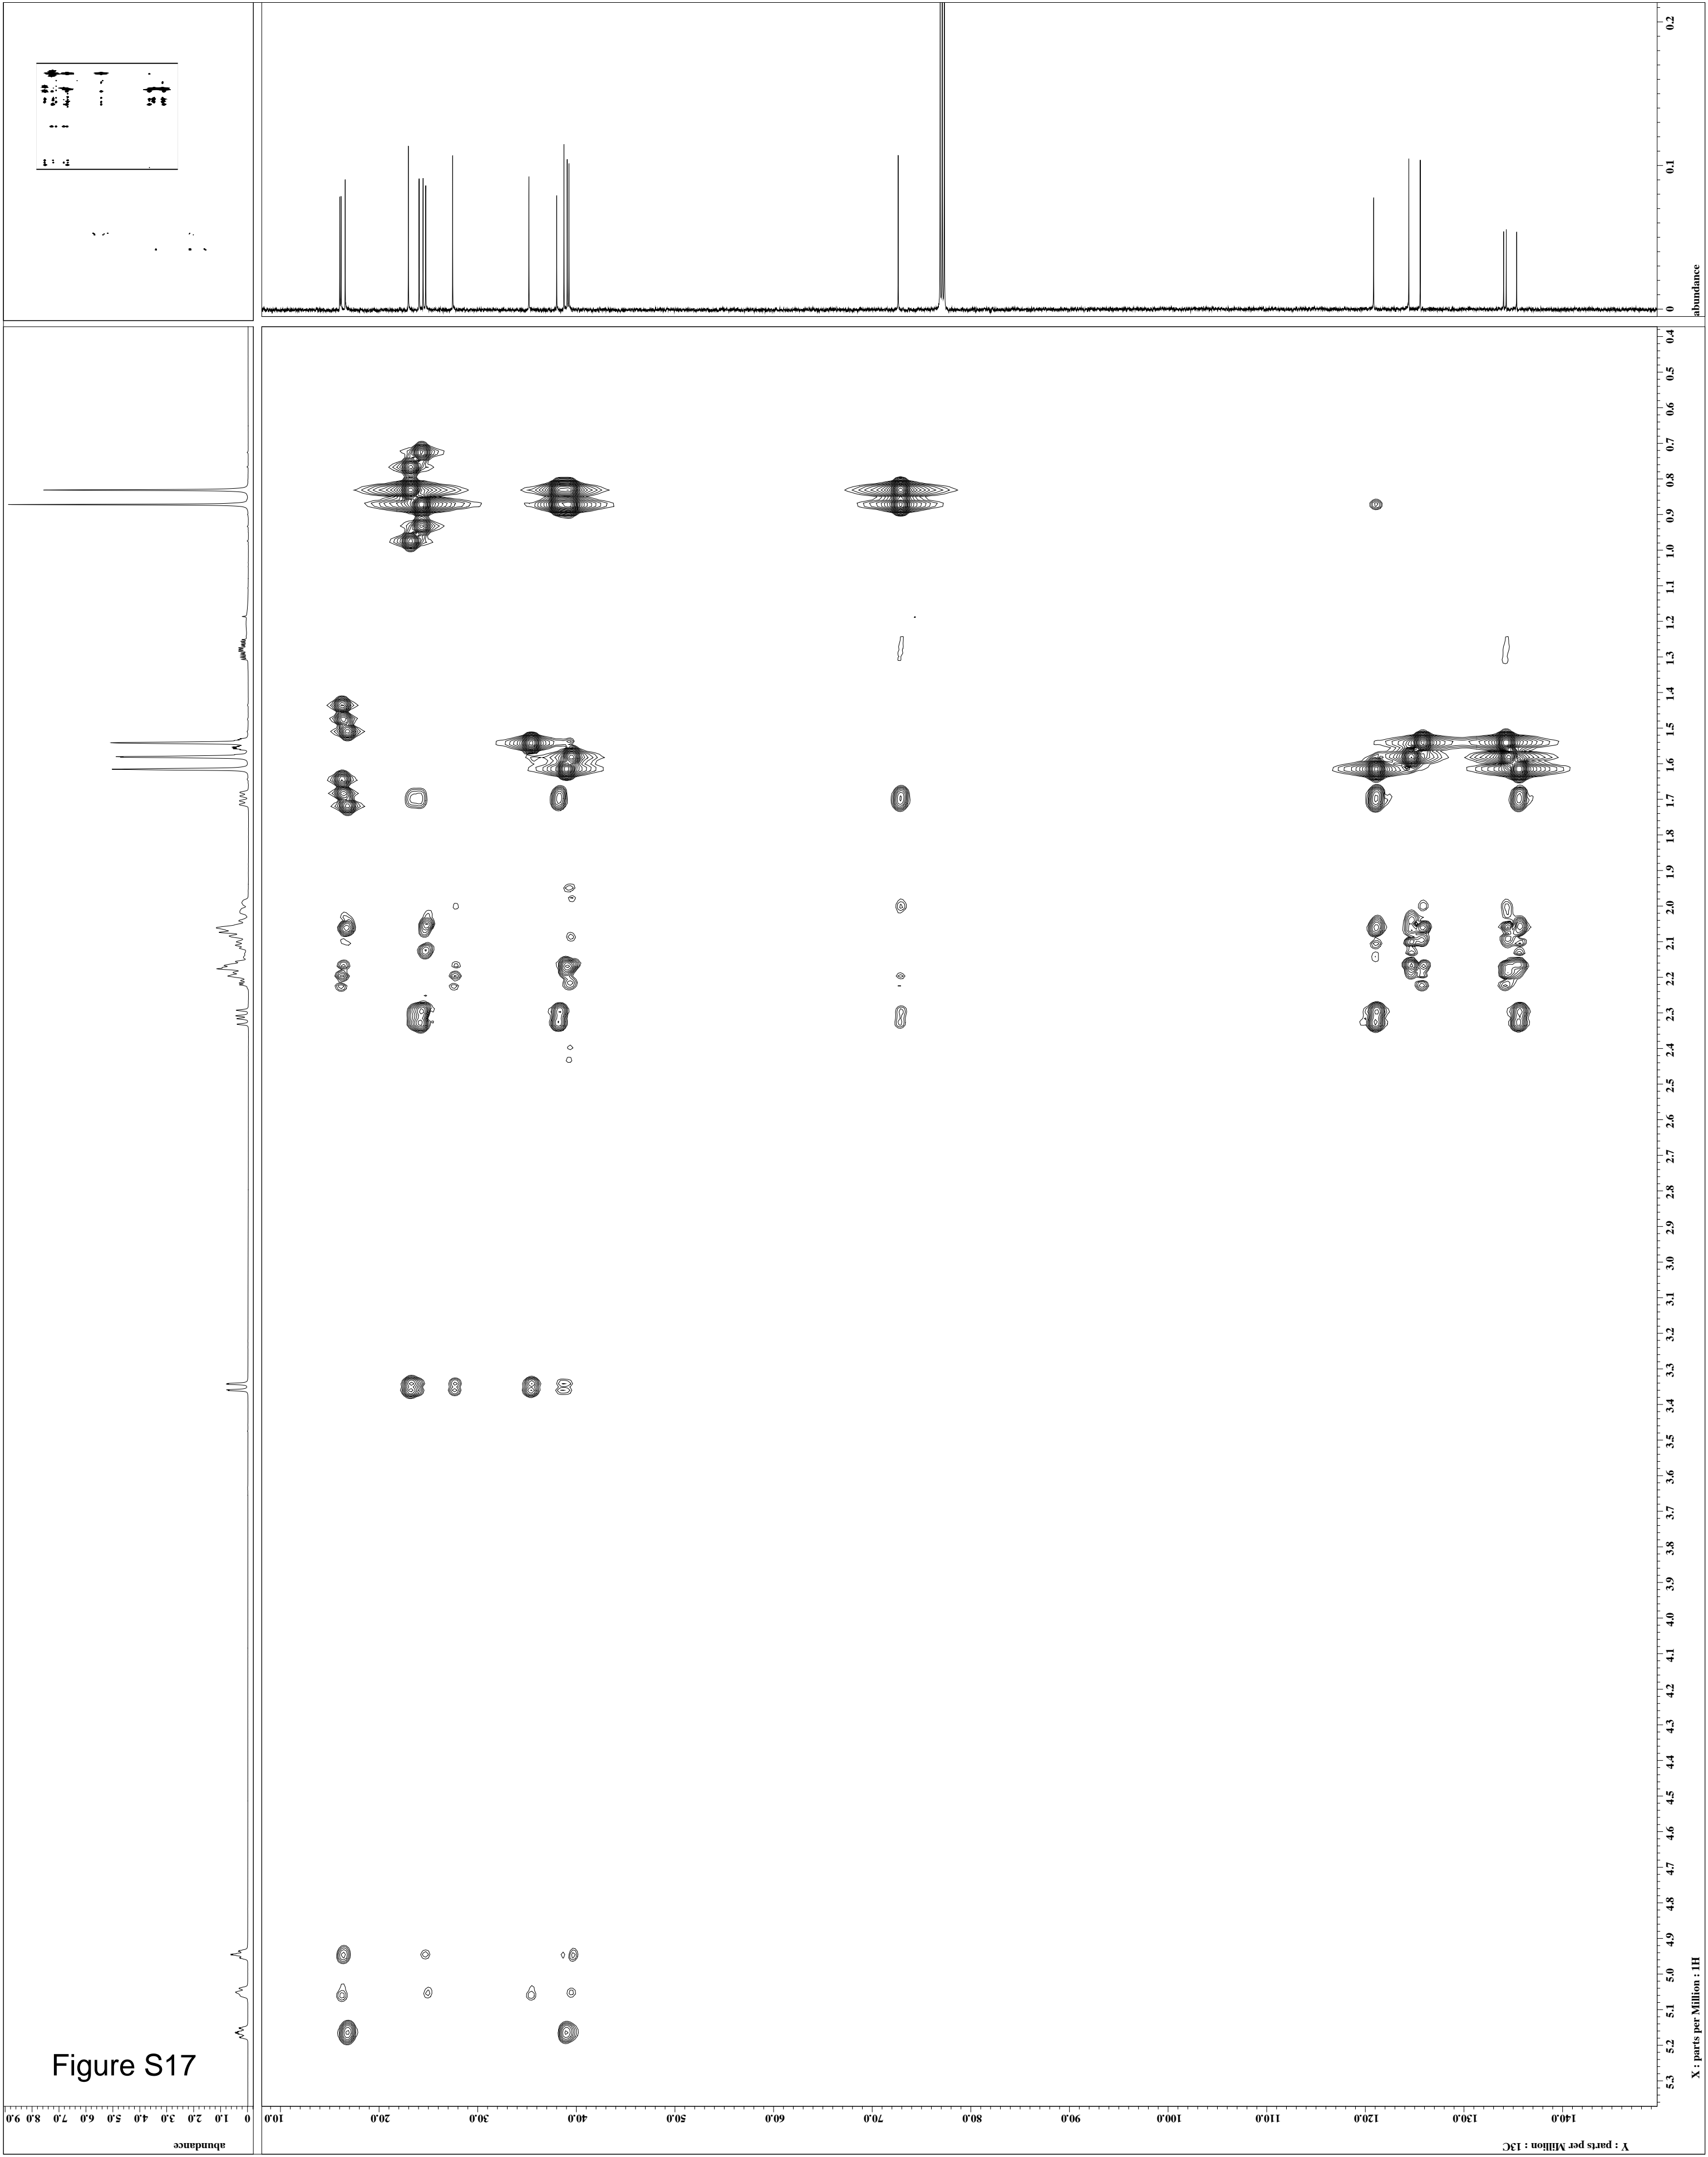

Figure S17

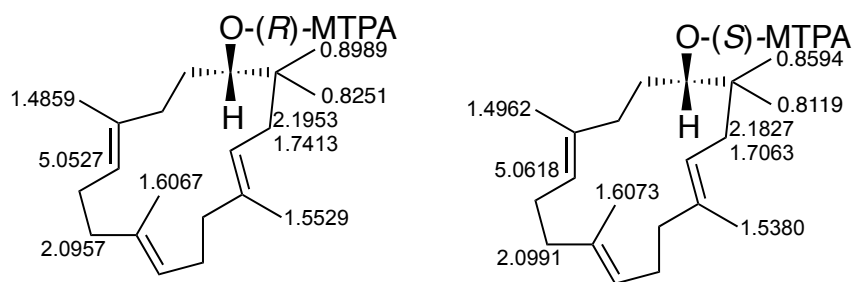

Figure S18
